# Supplementary material for: Expert elicitation on agricultural enhanced weathering highlights CO2 removal potential and uncertainties in loss pathways
Source: Research Square preprint supplement (doi:10.21203/rs.3.rs-7040857/v1), 2025-07-30
Supplement: Supplementary file 2 [file 15d446e01a521cf335bc8067.xlsx]

## Sheet: Sheet1
in_person	What is your area of expertise?	What is your industry?	What percentage of research time is spent (by you or averaged across your research group, if you run a lab) on each feedstock? [Basalt]	What percentage of research time is spent (by you or averaged across your research group, if you run a lab) on each feedstock? [Wollastonite]	What percentage of research time is spent (by you or averaged across your research group, if you run a lab) on each feedstock? [Olivine-rich (>50%) rock]	What percentage of research time is spent (by you or averaged across your research group, if you run a lab) on each feedstock? [Steel slag]	What percentage of research time is spent (by you or averaged across your research group, if you run a lab) on each feedstock? [Agricultural lime]	What percentage of research time is spent (by you or averaged across your research group, if you run a lab) on each feedstock? [Cement waste]	Please select the feedstock for which you are answering the questions. Address the feedstocks independently - e.g., consider their global in isolation of the other potential amendments. However, do note we are concerned about additional CDR, so do consider present day practices.	What percentage of your work focuses directly on enhanced weathering of this feedstock?	1) How important do you think the following factors are to its potential use in CDR on a scale of 1 (major impediment) to 5 (not an impediment) [Its total availability relative to scale of potential use to achieve meaningful climate impacts]	1) How important do you think the following factors are to its potential use in CDR on a scale of 1 (major impediment) to 5 (not an impediment) [Its potential to achieve permanent carbon dioxide removal]	1) How important do you think the following factors are to its potential use in CDR on a scale of 1 (major impediment) to 5 (not an impediment) [Its susceptibility to in-situ processes that reduce the CDR potential (e.g., surface-passivation)]	Realistically, what do you think is the lowest plausible possibility for system-wide, annual CO2e removal given widespread adoption? This includes emissions associated with processing, transport, and application, as well as any other GHG emissions/reductions that may occur throughout the entire process (e.g., N2O reductions, changes to organic carbon). Consider all agricultural lands (croplands, …	Realistically, what do you think is the highest plausible possibility for system-wide, annual CO2e removal given widespread adoption? It should be your best estimate of the higher end of the 95% confidence interval. This includes emissions associated with processing, transport, and application, as well as any other GHG emissions/reductions that may occur throughout the entire process (e.g., N2O r…	Realistically, what do you think is the most likely amount of system-wide, annual CO2 removal given widespread adoption? It should be your best estimate of the 50th percentile. This includes emissions associated with processing, transport, and application, as well as any other GHG emissions/reductions that may occur throughout the entire process (e.g., N2O reductions, changes to organic carbon). …	How confident are you that your defined range contains the true probability? In other words, a score of 50% means there are even odds your value contains the true probability, a score of 90 or 100% means you are extremely confident your range includes the true probability. (The purpose of this question is scaling responses between observers.)	What are 1-3 top variables that informed your estimate?	What are 1-3 factors that, if given better data, would best reduce our uncertainty in the overall potential? (text response)	Consider the case where enough material (note that the total amount would vary depending on the feedstock you are answering) is applied to potentially fix 10 tons of CO2/ha. Realistically, what do you think is the lowest plausible amount of that fixed CO2 which moves out of the surficial soils and into the vadose zone and groundwater within 20 years? In the figure, this is Fr. This is your best e…	Consider the case where enough material (note that the total amount would vary depending on the feedstock you are answering) is applied to potentially fix 10 tons of CO2/ha. Realistically, what do you think is the highest plausible amount of that fixed CO2 which moves out of the surficial soils and into the vadose zone and groundwater within 20 years? In the figure, this is Fr. This is your best …	Consider the case where enough material (note that the total amount would vary depending on the feedstock you are answering) is applied to potentially fix 10 tons of CO2/ha. Realistically, what do you think is the most plausible amount (50th percentile) of that fixed CO2 which moves out of the surficial soils and into the vadose zone and groundwater within 20 years? In the figure, this is Fr.	How confident are you that your defined range contains the true probability? In other words, a score of 50% means there are even odds your value contains the true probability, a score of 90 or 100% means you are extremely confident your range includes the true probability.	Given current methodologies for measuring loss (empirical or modeled), what do you think the likely relative error of the estimate would be relative to the true value, given a reasonable level of effort to quantify the error? Low values mean relatively little error, high values mean more error. 100% is meant to be interpreted as the error is equal to the estimate, >100% means the error is larger …	What 1-3 factors that informed your estimate?	What are 1-3 factors that, if given better data, would best reduce your uncertainty in the overall potential? This could be improved measurement techniques, maps, or anything else you think would help better resolve these percentages.	What is your assessment of the probability that this feedstock will cause significant ecosystem or human health damage at this stage when applied at commercially/climatically relevant amounts and scales? For this question, consider if this process was scaled up, not just the 10 tons of C in the example.	At this level of probability, is there likely to be public concerns and/or pushback?	If ERW were to become a fully-fledged CDR strategy and commercialized to make compensatory claims what do you think are necessary steps for quantification at this stage?	Consider the case where 10 tons of fixed CO2/ha enters the lower vadose zone and groundwater flow paths as bicarbonate. Realistically, what do you think is the lowest plausible amount of that fixed CO2 which moves through and out into the freshwater system? This is your best estimate of the lower end of the 5% confidence interval.	Realistically, what do you think is the highest plausible amount of that fixed carbon that moves through and out into the freshwater system? This is your best estimate of the upper end of the 95% confidence interval.	Realistically, what do you believe most accurately represents the most likely percentage (50th percentile)?	How confident are you that your defined range contains the true probability? In other words, a score of 50% means there are even odds your value contains the true probability, a score of 90 or 100% means you are extremely confident your range includes the true probability.	Given current methodologies for measuring loss (empirical or modeled), what do you think the likely relative error of the estimate would be relative to the true value, given a reasonable level of effort to quantify the error? Low values mean relatively little error, high values mean more error. 100% is meant to be interpreted as the error is equal to the estimate, >100% means the error is larger …	What 1-3 factors that informed your estimate?	What are 1-3 factors that, if given better data, would best reduce your uncertainty in the overall potential? This could be improved measurement techniques, maps, or anything else you think would help better resolve these percentages.	What is your assessment of the probability that this feedstock will cause significant ecosystem or human health damage at this stage when applied at commercially/climatically relevant amounts and scales? For this question, consider if this process was scaled up, not just the 10 tons of C in the example.	At this level of probability, is there likely to be public concerns and/or pushback?	If ERW were to become a fully-fledged CDR strategy and commercialized to make compensatory claims what do you think are necessary steps for quantification at this stage?	Consider the case where 10 tons of fixed CO2/ha as bicarbonate enters the freshwater stream system from the lower vadose zone/groundwater system above. Realistically, what do you think is the lowest plausible amount of that fixed carbon that moves through and out into the nearshore marine system? This is your best estimate of the lower end of the 5% confidence interval.	Realistically, what do you think is the highest plausible amount of that fixed CO2 which moves through and out into the nearshore marine system? This is your best estimate of the upper end of the 95% confidence interval.	Realistically, what do you believe most accurately represents the most likely percentage (50th percentile)?	How confident are you that your defined range contains the true probability? In other words, a score of 50% means there are even odds your value contains the true probability, a score of 90 or 100% means you are extremely confident your range includes the true probability.	Given current methodologies for measuring loss (empirical or modeled), what do you think the likely relative error of the estimate would be relative to the true value, given a reasonable level of effort to quantify the error? Low values mean relatively little error, high values mean more error. 100% is meant to be interpreted as the error is equal to the estimate, >100% means the error is larger …	What 1-3 factors that informed your estimate?	What are 1-3 factors that, if given better data, would best reduce your uncertainty in the overall potential? This could be improved measurement techniques, maps, or anything else you think would help better resolve these percentages.	What is your assessment of the probability that this feedstock will cause significant ecosystem or human health damage at this stage when applied at commercially/climatically relevant amounts and scales? For this question, consider if this process was scaled up, not just the 10 tons of C in the example.	At this level of probability, is there likely to be public concerns and/or pushback?	If ERW were to become a fully-fledged CDR strategy and commercialized to make compensatory claims what do you think are necessary steps for quantification at this stage?
y	Terrestrial biogeochemistry/geochemistry (incl. soil science)	Academic	<10%	11-50%	<10%	<10%	11-50%	<10%	Wollastonite	11-50%	1	5	3	0 Gt CO2e (no impact)	0.01 Gt CO2e (removal)	0 Gt CO2e (no impact)	0.6	Limited global wollastonite deposits deposits can contain considerable carbonate that may not be suitable for some ERW applications (e.g. acidic soils) these deposits are far from being pure wollastonite as they contain high abundances of recalcitrant minerals	Global wollastonite reserves average mineralogical composition particularly Wo abundance	2.0 tons	6.0 tons	3.0 tons	0.7	Approximately 50%	The wollastonite abundance in the rock material I have used has been 20-30 wt.% Wo other minerals are more recalcitrant.	The wollastonite abundance of the rock relative mineral and solubility trapping	0	No	Fully empirical measurements	5.0 tons	10.0 tons (all)	7.5 tons	0.8	Approximately 200%	pH of deeper soils and the possibility of carbonate formation that could halve CDR	Deep soil pH and conditions	0	No	Fully empirical measurements	5.0 tons	10.0 tons (all)	7.0 tons	0.75	Approximately 500%	Freshwater chemistry and likelihood of forming calcite	Freshwater chemistry is variable specific data of receiving waters is needed	0.05	No	Tightly data constrained model
y	Terrestrial biogeochemistry/geochemistry (incl. soil science)	Academic	<10%	11-50%	<10%	<10%	11-50%	<10%	Olivine-rich (>50%) rock		2	5	2	0.01 Gt CO2e (net removal)	0.1 Gt CO2e (removal)	0.1 Gt CO2e (removal)	0.6	Global abundance of olivine (>50%) deposits as these formations are often serpentinized olivine-rich rocks are high in Ni and Cr and very likely to not suitable for agricultural ERW Ol weathering rates are slower than expected given that powders can have relatively lower surface areas	Global olivine (>50%) reserves metal content and mineralogical composition and surface areas	0.0 tons (none)	2.0 tons	1.0 tons	0.8	Approximately 200%	Surface area of olivine can be lower than other minerals given crystal morphologies it may not weather as quickly as thought published rates do not appear very fast some studies have reported slow rates	More field studies using olivine-rich rock	0.9	Yes	Fully empirical measurements	7.0 tons	10.0 tons (all)	4.0 tons	0.5	Approximately 200%	Magnesite formation is kinetically inhibited at Earth's near-surface conditions	More studies that examine deep soil ERW there are very few meaning there is a lot of uncertanity	0.6	Yes	Fully empirical measurements	5.0 tons	10.0 tons (all)	7.0 tons	0.75	Approximately 500%	Magnesite formation inhibited at Earth's surface conditions the ERW signal being more "diluted" moving further away from the weathering site	Detailed and comprehensive freshwater chemical data which may be present in some places but not all	0.3	Yes	Tightly data constrained model
y	Terrestrial biogeochemistry/geochemistry (incl. soil science)	Academic	<10%	11-50%	<10%	<10%	11-50%	<10%	Basalt	0-10%	5	4	5	0.01 Gt CO2e (net removal)	0.5 Gt CO2e (removal)	0.1 Gt CO2e (removal)	0.7	Scaling up basalt mining in comparison to mining of (ultra)mafic ores today	Information on basalt (or similar rock) mining	1.0 tons	5.0 tons	3.0 tons	0.7	Approximately 500%	Basalt composition reactivity of plagioclase minerals amorphous content	Basalt composition including amorphous content	0.05	No	Fully empirical measurements	7.0 tons	10.0 tons (all)	4.0 tons	0.5	Approximately 500%	Magnesium content of basalt inhibition of magnesite formation	More deep soil ERW studies	0.1	No	Fully empirical measurements	5.0 tons	10.0 tons (all)	7.5 tons	0.7	Approximately 500%	Calcite saturation in river waters		0.05	No	Tightly data constrained model
y	Terrestrial biogeochemistry/geochemistry (incl. soil science)	Academic	<10%	11-50%	<10%	<10%	11-50%	<10%	Steel slag	0-10%	1	4	3	0.01 Gt CO2e (net removal)	0.25 Gt CO2e (removal)	0.1 Gt CO2e (removal)	0.7	Reactivity of slag metal content of slag may eliminate its use in agricultural historic slag would increases potential	Historic slag abundances slag compositions	6.0 tons	8.0 tons	7.0 tons	0.7	Approximately 100%	Percentage of reactive oxides	Data on slag mineral passivation	0.7	Yes	Fully empirical measurements	5.0 tons	10.0 tons (all)	7.5 tons	0.8	Approximately 200%	pH of deeper soils and the possibility of carbonate formation that could halve CDR	Deep soil pH and pore water chemistry	0.25	Yes	Fully empirical measurements	5.0 tons	10.0 tons (all)	7.5 tons	0.75	Approximately 200%	High reactivity of oxides may significantly alter freshwater and drive saturation of carbonates		0.25	Yes	Tightly data constrained model
y	Hydrology	Academic	11-50%	<10%	11-50%	<10%	<10%	<10%	Basalt	11-50%	4	3	2	0.1 Gt CO2e (removal)	2.0 Gt CO2e (removal)	0.5 Gt CO2e (removal)	0.75	availability of feedstock dissolution rates.	variability in field dissolution rates across soil types/biomes role of river chemistry and hydrodynamics on downstream efficiency losses.	1.0 tons	7.0 tons	5.0 tons	0.65	Approximately 50%	typical dissolution efficiencies observed in soils.	improved statistical techniques to optimize soil sampling (for then measuring mineral depletion CEC etc.) effective approaches to collect representative leachate from the field (for water chemistry and fluxes) improved EW models	0.5	No	Tightly data constrained model	6.5 tons	9.5 tons	7.0 tons	0.65	Approximately 70%	often short vadose zone travel time due to preferential flow low capacity of groundwater to exchange/release CO2	detailed knowledge of flow paths and groundwater dynamics (spatial and temporal) groundwater chemistry	0.5	Don't know	Tightly data constrained model	6.5 tons	9.0 tons	7.5 tons	0.6	Approximately 90%	possible precipitation of carbonates and degassing at groundwater/atmosphere/river interface and uptake of cations by biota along the freshwater system	More freshwater system measurements across flowpaths including groundwater-atmosphere-river interface	0.4	No	Tightly data constrained model
y	Hydrology	Academic	11-50%	<10%	11-50%	<10%	<10%	<10%	Wollastonite	0-10%	2	3	2	0.1 Gt CO2e (removal)	1 Gt CO2e (removal)	0.75 Gt CO2e (removal)	0.6	dissolution rate and global availability of wollastonite	actual availability dissolution rate in the field downstream efficiency reduction due to degassing/carbonate precipitation	2.0 tons	8.0 tons	6.5 tons	0.65	Approximately 50%	typical dissolution efficiencies observed in soils.	improved statistical techniques to optimize soil sampling (for then measuring mineral depletion CEC etc.) effective approaches to collect representative leachate from the field (for water chemistry and fluxes) improved EW models	0.3	No	Tightly data constrained model	6.5 tons	9.0 tons	6.5 tons	0.6	Approximately 70%	often short vadose zone travel time due to preferential flow low capacity of groundwater to exchange/release CO2 higher resulting Ca water concentration than other feedstocks (e.g. olivine)	detailed knowledge of flow paths and groundwater dynamics (spatial and temporal) groundwater chemistry	0.3	No	Tightly data constrained model	6.0 tons	8.0 tons	9.5 tons	0.55	Approximately 70%	Higher Ca water concentrations than for other feedstocks possible precipitation of carbonates and degassing at groundwater/atmosphere/river interface and uptake of cations by biota along the freshwater system	More freshwater system measurements across flowpaths including groundwater-atmosphere-river interface	0.3	No	Tightly data constrained model
y	Hydrology	Academic	11-50%	<10%	11-50%	<10%	<10%	<10%	Olivine-rich (>50%) rock	11-50%	3	3	2	0.1 Gt CO2e (removal)	1.5 Gt CO2e (removal)	0.5 Gt CO2e (removal)	0.6	dissolution rates potential environmental damage	dissolution rate in the field downstream efficiency reduction due to degassing/carbonate precipitation potential limits on application rates due to toxicity concerns	2.0 tons	8.0 tons	6.5 tons	0.65	Approximately 50%	typical dissolution efficiencies observed in soils.	improved statistical techniques to optimize soil sampling (for then measuring mineral depletion CEC etc.) effective approaches to collect representative leachate from the field (for water chemistry and fluxes) improved EW models	0.7	Yes	Tightly data constrained model	6.5 tons	9.5 tons	7.0 tons	0.6	Approximately 70%	often short vadose zone travel time due to preferential flow low capacity of groundwater to exchange/release CO2 lower probability to trigger carbonate precipitation	detailed knowledge of flow paths and groundwater dynamics (spatial and temporal) groundwater chemistry	0.7	Yes	Tightly data constrained model	7.0 tons	8.5 tons	9.5 tons	0.55	Approximately 70%	potential degassing at groundwater/atmosphere/river interface and uptake of cations by biota along the freshwater system however lower Ca concentrations	More freshwater system measurements across flowpaths including groundwater-atmosphere-river interface	0.5	Don't know	Tightly data constrained model
y	Hydrology	Academic	11-50%	<10%	11-50%	<10%	<10%	<10%	Agricultural Lime	0-10%	3	1	4	-0.5 Gt CO2e (net emission)	0.5 Gt CO2e (removal)	0.1 Gt CO2e (removal)	0.6	potential carbonate precipitation large cropland areas already apply it even if sub-optimally	estimates of where and how much lime is already applied potential for carbonate precipitation	2.0 tons	6.0 tons	4.0 tons	0.6	Approximately 50%	stoichiometry dissolution rates	improved statistical techniques to optimize soil sampling (for then measuring mineral depletion CEC etc.) effective approaches to collect representative leachate from the field (for water chemistry and fluxes) improved EW models	0.4	No	Tightly data constrained model	4.0 tons	7.0 tons	5.0 tons	0.6	Approximately 70%	potential carbonate precipitation along flowpaths	detailed knowledge of flow paths and groundwater dynamics (spatial and temporal) groundwater chemistry	0.4	No	Tightly data constrained model	4.0 tons	6.5 tons	5.0 tons	0.55	Approximately 70%	Higher Ca water concentrations than for other feedstocks possible precipitation of carbonates and degassing at groundwater/atmosphere/river interface and uptake of cations by biota along the freshwater system	More spatiotemporal freshwater system measurements across flowpaths including groundwater-atmosphere-river interface	0.3	No	Tightly data constrained model
y	Terrestrial biogeochemistry/geochemistry (incl. soil science)	Academic	<10%	11-50%	<10%	<10%	11-50%	<10%	Agricultural Lime	11-50%	5	2	1	-0.1 Gt CO2e (net emission)	0.5 Gt CO2e (removal)	0.25 Gt CO2e (removal)	0.8	Availability of limestone relative ease of mining CDR less efficient but faster with carbonates than silicates	Data on CO2 release versus drawdown in varying soils	6.0 tons	10.0 tons (all)	7.0 tons	0.7	Approximately 100%	Potential CO2 release fast reactivity of carbonates	Information on how higher pH may simulate microbial respiration info on any reformation of carbonates	0	No	Fully empirical measurements	0.0 tons (none)	10.0 tons (all)	5.0 tons	1	Approximately 200%	Considered carbonate precipitation in deeper alkaline soils	pH and chemistry of deeper soils to assess likelihood of secondary carbonate formation	0	No	Fully empirical measurements	0.0 tons (none)	10.0 tons (all)	5.0 tons	1	Approximately 200%	Carbonate formation within freshwater system that potentially reverses CDR	Freshwater chemistry and carbonate saturation	0.1	No	Tightly data constrained model
y	Terrestrial biogeochemistry/geochemistry (incl. soil science)	Academic	<10%	11-50%	<10%	<10%	11-50%	<10%	Concrete waste	0-10%	2	4	4	0.01 Gt CO2e (net removal)	0.25 Gt CO2e (removal)	0.1 Gt CO2e (removal)	0.75	Global availability of concrete waste its high reactivity co-benefit of using a waste material	Global availability of concrete waste its composition to assess appropriate use and CDR potential	7.0 tons	9.0 tons	8.0 tons	0.65	Approximately 100%	fast reactivity of concrete waste	Information on how higher pH may simulate microbial respiration	0.05	No	Fully empirical measurements	5.0 tons	10.0 tons (all)	7.5 tons	0.8	Approximately 200%	Considered carbonate precipitation in deeper alkaline soils	pH and chemistry of deeper soils to assess likelihood of secondary carbonate formation	0.05	No	Fully empirical measurements	5.0 tons	10.0 tons (all)	7.5 tons	0.8	Approximately 200%	Carbonate formation within freshwater system that potentially reverses CDR	Freshwater chemistry and carbonate saturation	0.1	No	Tightly data constrained model
y	Hydrology	Academic	11-50%	<10%	11-50%	<10%	<10%	<10%	Steel slag	0-10%	2	3	4	0.01 Gt CO2e (net removal)	0.5 Gt CO2e (removal)	0.1 Gt CO2e (removal)	0.6	availability of feedstock potential environmental toxicity	accurate projections of feedstock availability across different regions detailed information on composition and solubility of heavy metals	6.5 tons	8.0 tons	7.0 tons	0.6	Approximately 50%	it is a fast reacting material	improved statistical techniques to optimize soil sampling (for then measuring mineral depletion CEC etc.) effective approaches to collect representative leachate from the field (for water chemistry and fluxes)	0.8	Yes	Tightly data constrained model	5.0 tons	8.0 tons	7.0 tons	0.6	Approximately 70%	higher resulting Ca water concentration than other feedstocks (e.g. olivine) also due to fast dissolution often short vadose zone travel time due to preferential flow low capacity of groundwater to exchange/release CO2	detailed knowledge of flow paths and groundwater dynamics (spatial and temporal) groundwater chemistry	0.8	Yes	Tightly data constrained model	5.5 tons	7.0 tons	6.0 tons	0.55	Approximately 70%	Higher Ca water concentrations than for other feedstocks possible precipitation of carbonates and degassing at groundwater/atmosphere/river interface and uptake of cations by biota along the freshwater system	More freshwater system spatiotemporal measurements across flowpaths including groundwater-atmosphere-river interface	0.5	Don't know	Tightly data constrained model
y	Hydrology	Academic	11-50%	<10%	11-50%	<10%	<10%	<10%	Concrete waste	0-10%	3	3	4	0.01 Gt CO2e (net removal)	0.5 Gt CO2e (removal)	0.25 Gt CO2e (removal)	0.6	availability of feedstock over time concerns with composition of concrete waste	accurate projections of feedstock availability across different regions detailed information on composition	6.5 tons	8.0 tons	7.0 tons	0.6	Approximately 50%	relatively fast dissolution	improved statistical techniques to optimize soil sampling (for then measuring mineral depletion CEC etc.) effective approaches to collect representative leachate from the field (for water chemistry and fluxes)	0.65	Don't know	Tightly data constrained model	5.0 tons	8.0 tons	7.0 tons	0.6	Approximately 70%	higher resulting Ca water concentration than other feedstocks (e.g. olivine) also due to fast dissolution often short vadose zone travel time due to preferential flow low capacity of groundwater to exchange/release CO2	detailed knowledge of flow paths and groundwater dynamics (spatial and temporal) groundwater chemistry	0.6	Don't know	Tightly data constrained model	5.5 tons	7.0 tons	6.0 tons	0.55	Approximately 70%	Higher Ca water concentrations than for other feedstocks possible precipitation of carbonates and degassing at groundwater/atmosphere/river interface and uptake of cations by biota along the freshwater system	More freshwater system spatiotemporal measurements across flowpaths including groundwater-atmosphere-river interface	0.5	Don't know	Tightly data constrained model
n	Terrestrial biogeochemistry/geochemistry (incl. soil science)	Academic	51-75%		<10%	11-50%		<10%	Basalt	51-75%	4	3	2	-0.1 Gt CO2e (net emission)	4 Gt CO2e (removal)	1.5 Gt CO2e (removal)	0.7	basalt availability cropland area reaction rates	better understanding of interaction with soil processes (especially organic carbon)	1.0 tons	9.0 tons	3.0 tons	0.7	Approximately 100%	potential cation retention in soil potential clay formation	better understanding of the fate of cations released during weathering	0.15	Don't know	Tightly data constrained model	2.0 tons	10.0 tons (all)	6.5 tons	0.8	Approximately 100%	assuming ph~6	pH water flow rate	0.15	Don't know	Tightly data constrained model	1.0 tons	10.0 tons (all)	7.0 tons	0.8	Approximately 100%	assuming pH of the water ~6	potential for degassing or carbonate precipitation (dependent on pH)	0.15	Don't know	Tightly data constrained model
n	Terrestrial biogeochemistry/geochemistry (incl. soil science)	Academic	51-75%		<10%	11-50%		<10%	Steel slag	11-50%	4	3	3	0 Gt CO2e (no impact)	1.5 Gt CO2e (removal)	0.1 Gt CO2e (removal)	0.6	restrictions on steel slag application steel slag availability	projections of where (some types of) steel slag is/will be allowed for agricultural application	2.0 tons	9.0 tons	4.0 tons	0.7	Approximately 100%	potential cation retention in soil potential clay formation and carbonate precipitation	better understanding of the fate of cations released during weathering	0.5	Yes	Tightly data constrained model	2.0 tons	10.0 tons (all)	7.0 tons	0.8	Approximately 100%	assuming pH~6	pH water flow rate secondary mineral formation	0.5	Yes	Tightly data constrained model	1.0 tons	10.0 tons (all)	7.0 tons	0.8	Approximately 100%	assuming pH of the water ~6	potential for degassing or carbonate precipitation (dependent on pH)	0.5	Yes	Tightly data constrained model
n	Terrestrial biogeochemistry/geochemistry (incl. soil science)	Academic	51-75%		<10%	11-50%		<10%	Concrete waste	0-10%	4	2	3	-0.01 Gt CO2e (net emission)	1.5 Gt CO2e (removal)	0.1 Gt CO2e (removal)	0.6	feedstock availability and likelihood that it would be applied widely reactivity of cement waste	information about where cement waste is/will be allowed for agricultural application projections about feedstock availability	1.0 tons	9.0 tons	3.0 tons	0.7	Approximately 100%	potential cation retention in soil potential clay formation and carbonate precipitation	better understanding of the fate of cations released during weathering	0.15	Don't know	Tightly data constrained model	2.0 tons	10.0 tons (all)	6.5 tons	0.8	Approximately 100%	assuming ph~6	pH water flow rate	0.15	Don't know	Tightly data constrained model	1.0 tons	10.0 tons (all)	7.0 tons	0.8	Approximately 100%	assuming pH~6	potential for degassing or carbonate precipitation (dependent on pH)	0.15	Don't know	Tightly data constrained model
n	Terrestrial biogeochemistry/geochemistry (incl. soil science)	Academic	51-75%		<10%	11-50%		<10%	Olivine-rich (>50%) rock	0-10%	3	3	3	-0.01 Gt CO2e (net emission)	0.5 Gt CO2e (removal)	0.1 Gt CO2e (removal)	0.6	feedstock availability restrictions for application in agriculture reaction rates	knowing where olivine-rich rock powder is/will be allowed to apply in agriculture	3.0 tons	9.0 tons	6.0 tons	0.65	Approximately 100%	cation retention in soil potential losses through carbonate precipitation and clay formation (but less than with basalt)	better understanding of the fate of cations released during weathering	0.3	Don't know	Tightly data constrained model	2.0 tons	10.0 tons (all)	7.0 tons	0.75	Approximately 100%	assuming pH~6	pH water flow rate	0.3	Don't know	Tightly data constrained model	1.0 tons	10.0 tons (all)	7.0 tons	0.8	Approximately 100%	assuming pH of the water ~6	potential for degassing or carbonate precipitation	0.3	Don't know	Tightly data constrained model
n	Terrestrial biogeochemistry/geochemistry (incl. soil science)	Academic	51-75%		<10%	11-50%		<10%	Wollastonite	0-10%	4	3	3	-0.01 Gt CO2e (net emission)	1 Gt CO2e (removal)	0.1 Gt CO2e (removal)	0.6	wollastonite availabilty	don't know. haven't worked with wollastonite.	3.0 tons	9.0 tons	6.0 tons	0.7	Approximately 100%	cation retention in soil potential losses through carbonate precipitation and clay formation (but less than with basalt)	better understanding of the fate of cations released during weathering	0.15	Don't know	Tightly data constrained model	2.0 tons	10.0 tons (all)	7.0 tons	0.75	Approximately 100%	assuming pH~6	pH water flow rate	0.15	Don't know	Tightly data constrained model	1.0 tons	10.0 tons (all)	7.0 tons	0.8	Approximately 100%	assuming pH of the water ~6	potential degassing or carbonate formation (dependent on pH)	0.15	Don't know	Tightly data constrained model
n	Terrestrial biogeochemistry/geochemistry (incl. soil science)	Academic	51-75%		<10%	11-50%		<10%	Agricultural Lime	0-10%	5	1	3	-1 Gt CO2e (net emission)	0.01 Gt CO2e (removal)	0 Gt CO2e (no impact)	0.6	CO2 release during production process widespread application	don't know not a liming expert	3.0 tons	9.0 tons	6.0 tons	0.7	Approximately 100%	cation retention in soil potential losses through carbonate precipitation (but less than with basalt)	better understanding of the fate of cations released during weathering	0.05	No	Model-based estimates with empirical checks	2.0 tons	10.0 tons (all)	7.0 tons	0.75	Approximately 100%	assuming pH~6	pH water flow rate	0.05	No	Model-based estimates with empirical checks	1.0 tons	10.0 tons (all)	7.0 tons	0.8	Approximately 100%	assuming pH of the water ~6	potential degassing or carbonate formation (dependent on pH)	0.05	No	Model-based estimates with empirical checks
y	Terrestrial biogeochemistry/geochemistry (incl. soil science) Freshwater biogeochemistry/geochemistry Other	NGO CDR focused	11-50%	<10%	<10%	<10%	11-50%	<10%	Steel slag	0-10%	1	1	3	-0.1 Gt CO2e (net emission)	0.01 Gt CO2e (removal)	0 Gt CO2e (no impact)	0.75	Steel slag availability and projections land area	agronomic consequences / risks of steel slag likelihood of secondary mineral formation and passivation	3.0 tons	9.0 tons	6.5 tons	0.85	Approximately 100%	rock application amount dissolution soil column lags / losses water infiltration	SOC response secondary mineral formation	0.7	Don't know	Fully empirical measurements	0.5 tons	9.0 tons	5.0 tons	0.95	Approximately 200%	potential flowpaths secondary mineral precipitation re-equilibration with deep soil / gw	baseline catchment-scale secondary mineral formation response of secondary minerals and gw chemistry to ERW pulse OC response	0.7	Don't know	Tightly data constrained model	3.0 tons	9.5 tons	6.5 tons	0.85	Approximately 500%	uncertainty in the OC pool assumed higher potential respiration loss at lower stream orders uncertainty in cation sinks	dynamics of ephemeral streams and streams with highly variable flow.	0.6	Don't know	Tightly data constrained model
y	Terrestrial biogeochemistry/geochemistry (incl. soil science) Freshwater biogeochemistry/geochemistry Marine biogeochemistry/geochemistry Hydrology	Academic	75% +	<10%	<10%	<10%	75% +	<10%	Basalt	76-100%	5	5	3	0 Gt CO2e (no impact)	4 Gt CO2e (removal)	2.0 Gt CO2e (removal)	0.8	basalt weathering rate and basalt availability	Real rock weathering rate in nature across different climatic and hydrologic regimes The carbon loss during transport of dissolved species from soil to river and then to ocean	2.0 tons	8.0 tons	5.0 tons	0.7	Approximately 100%	literature review online information	Available soil data flow path of the bicarbonate ions (to groundwater or surface runoff) the organic carbon cycle	0.3	No	Model-based estimates with empirical checks	2.0 tons	8.0 tons	5.0 tons	0.7	Approximately 100%	literature review and colleague information	Available groundwater data flow path of groundwater seasonal variation of groudwater-freshwater exchange	0.2	No	Model-based estimates with empirical checks	5.0 tons	9.0 tons	8.0 tons	0.8	Approximately 70%	literature	River hydrochemistry over the spatiotemporal scales Better field monitoring (especially CO2 fluxes) Better understanding of the river carbon cycling processes	0.3	No	Model-based estimates with empirical checks
y	Terrestrial biogeochemistry/geochemistry (incl. soil science) Freshwater biogeochemistry/geochemistry Other	NGO CDR focused	11-50%	<10%	<10%	<10%	11-50%	<10%	Agricultural Lime	11-50%	4	2	2	-0.25 Gt CO2e (net emission)	0.25 Gt CO2e (removal)	0.1 Gt CO2e (removal)	0.9	current global lime production intersection of ag lands and water balance / soil pH downstream cation loss	intersection with current and future fertilizer use effects on background calcite dissolution organic C response	1.5 tons	7.5 tons	5.0 tons	0.8	Approximately 100%	calcite saturation and precipitation organic C infiltration	better analytical precision for SIC / MRV for aglime strong acid contributions organic C response	0.1	Don't know	Fully empirical measurements	0.0 tons (none)	9.0 tons	5.0 tons	0.95	Approximately 200%	transport length scales secondary precipitation OC response	secondary precipitation in catchment baseline weathering flux response to ERW	0.1	Don't know	Tightly data constrained model	2.0 tons	10.0 tons (all)	6.0 tons	0.9	Approximately 500%	OC dynamics flux variability across stream orders uncertainty in cation sinks	secondary precipitation ephemeral and highly variable flow stream C-cycling long-term watershed scale aqueous geochemical measurements	0.1	Don't know	Tightly data constrained model
y	Terrestrial biogeochemistry/geochemistry (incl. soil science) Freshwater biogeochemistry/geochemistry Marine biogeochemistry/geochemistry Hydrology	Academic	75% +	<10%	<10%	<10%	75% +	<10%	Wollastonite	0-10%	3	5	3	0 Gt CO2e (no impact)	2.0 Gt CO2e (removal)	1 Gt CO2e (removal)	0.6	domain knowledge and literature	The availability of wollastonite wollastonite weathering rate in nature environment The carbon loss during transport of dissolved species from soil to river and then to ocean	2.0 tons	8.0 tons	5.0 tons	0.6	Approximately 100%	domain knowledge and literature review	Available soil data flow path of the bicarbonate ions (to groundwater or surface runoff) the plant effect	0.3	No	Model-based estimates with empirical checks	2.0 tons	8.0 tons	5.0 tons	0.5	Approximately 100%	domain knowledge and literature review	Available groundwater data flow path of groundwater seasonal variation of groundwater-freshwater exchange	0.3	No	Model-based estimates with empirical checks	7.0 tons	9.0 tons	8.0 tons	0.8	Approximately 50%	domain knowledge and literature review	River hydrochemistry over the spatiotemporal scales Better field monitoring (especially CO2 fluxes) Better understanding of the river carbon cycling processes	0.3	No	Model-based estimates with empirical checks
y	Terrestrial biogeochemistry/geochemistry (incl. soil science) Freshwater biogeochemistry/geochemistry Other	NGO CDR focused	11-50%	<10%	<10%	<10%	11-50%	<10%	Concrete waste	0-10%	2	2	2	-0.1 Gt CO2e (net emission)	0.1 Gt CO2e (removal)	0.01 Gt CO2e (removal)	0.85	concrete waste production and 20 year projections cdr potentials sourcing / spreading emissions	organic C response emissions LCA	2.0 tons	9.0 tons	7.0 tons	0.85	Approximately 100%	dissolution and potential for secondary mineral formation organic C response lags / losses	OC response secondary precipitation passivation dynamics	0.3	Don't know	Fully empirical measurements	0.5 tons	9.0 tons	5.0 tons	0.95	Approximately 200%	potential flowpaths infiltration cation sinks OC response	catchment scale monitoring constraining the baseline	0.15	Don't know	Tightly data constrained model	3.0 tons	10.0 tons (all)	7.0 tons	0.85	Approximately 500%	C and cation response to flow rate cation sinks IC-OC interactions	OC response effect on baseline weathering	0.15	Don't know	Tightly data constrained model
y	Terrestrial biogeochemistry/geochemistry (incl. soil science) Freshwater biogeochemistry/geochemistry Marine biogeochemistry/geochemistry Hydrology	Academic	75% +	<10%	<10%	<10%	75% +	<10%	Olivine-rich (>50%) rock	0-10%	3	5	3	0 Gt CO2e (no impact)	3 Gt CO2e (removal)	2.0 Gt CO2e (removal)	0.6	domain knowledge and literature review	The availability of olivine olivine weathering rate in nature environment The carbon loss during transport of dissolved species from soil to river and then to ocean	2.0 tons	8.0 tons	5.0 tons	0.6	Approximately 100%	domain knowledge and literature review	Available soil data flow path of the bicarbonate ions (to groundwater or surface runoff) the plant effect	0.5	Yes	Model-based estimates with empirical checks	2.0 tons	8.0 tons	5.0 tons	0.5	Approximately 100%	domain knowledge and literature review	Available groundwater data flow path of groundwater seasonal variation of groundwater-freshwater exchange	0.3	No	Model-based estimates with empirical checks	7.0 tons	9.0 tons	8.0 tons	0.8	Approximately 50%	domain knowledge and literature review	River hydrochemistry over the spatiotemporal scales Better field monitoring (especially CO2 fluxes) Better understanding of the river carbon cycling processes	0.5	Yes	Model-based estimates with empirical checks
y	Terrestrial biogeochemistry/geochemistry (incl. soil science) Freshwater biogeochemistry/geochemistry Other	NGO CDR focused	11-50%	<10%	<10%	<10%	11-50%	<10%	Basalt	11-50%	3	2	2	-0.25 Gt CO2e (net emission)	0.25 Gt CO2e (removal)	0.1 Gt CO2e (removal)	0.9	emissions current extraction ag availability and climate	secondary mineral formation OC response agronomic consequences of slower-dissolving feedstock in the long run	0.0 tons (none)	7.0 tons	3.0 tons	0.85	Approximately 70%	basalt weathering rates fertilizer inputs secondary mineral formation	consequences of high dust fluxes surface passivation cation sinks	0.3	Don't know	Fully empirical measurements	0.0 tons (none)	9.5 tons	4.0 tons	0.95	Approximately 200%	flowpaths secondary minerals groundwater chemistry	catchment scale cation losses baseline weathering fluxes and their response to ERW	0.3	Don't know	Tightly data constrained model	3.0 tons	9.5 tons	7.0 tons	0.8	Approximately 500%	OC-IC interactions effects of flow rate variability potential respiration losses after aquatic photosynthesis	better catchment-scale datasets and models	0.3	Don't know	Tightly data constrained model
y	Terrestrial biogeochemistry/geochemistry (incl. soil science) Freshwater biogeochemistry/geochemistry Marine biogeochemistry/geochemistry Hydrology	Academic	75% +	<10%	<10%	<10%	75% +	<10%	Steel slag	0-10%	4	4	2	0.5 Gt CO2e (removal)	4 Gt CO2e (removal)	2.0 Gt CO2e (removal)	0.7	domain knowledge and literature review	The availability of steel slag steel slag weathering rate in nature environment the composition of steel slag	2.0 tons	7.0 tons	4.0 tons	0.5	Approximately 100%	domain knowledge and literature review	Available soil data flow path of the bicarbonate ions (to groundwater or surface runoff) the plant effect	0.1	No	Model-based estimates with empirical checks	4.0 tons	9.0 tons	6.0 tons	0.6	Approximately 100%	domain knowledge and literature review	Available groundwater data flow path of groundwater seasonal variation of groundwater-freshwater exchange	0.1	No	Model-based estimates with empirical checks	5.0 tons	8.0 tons	7.0 tons	0.7	Approximately 70%	domain knowledge and literature review	River hydrochemistry over the spatiotemporal scales Better field monitoring (especially CO2 fluxes) Better understanding of the river carbon cycling processes	0.1	No	Model-based estimates with empirical checks
y	Terrestrial biogeochemistry/geochemistry (incl. soil science) Freshwater biogeochemistry/geochemistry Other	NGO CDR focused	11-50%	<10%	<10%	<10%	11-50%	<10%	Wollastonite	0-10%	1	3	3	-0.1 Gt CO2e (net emission)	0.01 Gt CO2e (removal)	0 Gt CO2e (no impact)	0.85	wollastonite availability and reserves secondary precipitation upstream emissions	future mining projections and mineral resource allocation techno-economic analysis for wollastonite	2.5 tons	9.5 tons	6.0 tons	0.9	Approximately 100%	OC response lags / losses infiltration rates	better models for highly reactive minerals SOC response data future fertilizer projections	0.2	Don't know	Fully empirical measurements	0.5 tons	9.0 tons	5.0 tons	0.95	Approximately 200%	flowpath secondary mineral precipitation aqueous geochemistry	catchment scale observational data and models catchment-scale responses to ERW pulses	0.2	Don't know	Tightly data constrained model	3.0 tons	9.5 tons	6.5 tons	0.85	Approximately 500%	state of models and observations dynamics across stream orders	flow rate effects on C and cation loss	0.2	Don't know	Tightly data constrained model
y	Terrestrial biogeochemistry/geochemistry (incl. soil science) Freshwater biogeochemistry/geochemistry Marine biogeochemistry/geochemistry Hydrology	Academic	75% +	11-50%	11-50%	11-50%	75% +	11-50%	Agricultural Lime	76-100%	5	4	5	1 Gt CO2e (removal)	> 5 Gt CO2e (removal)	4 Gt CO2e (removal)	0.7	domain knowledge and literature review	The availability of lime The carbon loss during transport of dissolved species from soil to river and then to ocean	2.0 tons	7.0 tons	4.0 tons	0.5	Approximately 100%	domain knowledge and literature review	Available soil data flow path of the bicarbonate ions (to groundwater or surface runoff) the plant effect	0.1	No	Model-based estimates with empirical checks	4.0 tons	9.0 tons	6.0 tons	0.65	Approximately 70%	domain knowledge and literature review	Available groundwater data flow path of groundwater seasonal variation of groundwater-freshwater exchange	0.1	No	Model-based estimates with empirical checks	5.0 tons	8.0 tons	7.0 tons	0.7	Approximately 70%	domain knowledge and literature review	River hydrochemistry over the spatiotemporal scales Better field monitoring (especially CO2 fluxes) Better understanding of the river carbon cycling processes	0.1	No	Model-based estimates with empirical checks
y	Terrestrial biogeochemistry/geochemistry (incl. soil science) Freshwater biogeochemistry/geochemistry Marine biogeochemistry/geochemistry Hydrology	Academic	75% +	<10%	<10%	<10%	75% +	11-50%	Concrete waste	0-10%	3	4	5	0.5 Gt CO2e (removal)	4 Gt CO2e (removal)	2.0 Gt CO2e (removal)	0.5	domain knowledge and literature review	The availability of cement or concrete waste weathering rate in nature environment The carbon loss during transport of dissolved species from soil to river and then to ocean	2.0 tons	7.0 tons	4.0 tons	0.5	Approximately 10%	domain knowledge and literature review	Available soil data flow path of the bicarbonate ions (to groundwater or surface runoff) the biological effect	0.1	No	Model-based estimates with empirical checks	4.0 tons	9.0 tons	6.0 tons	0.65	Approximately 70%	domain knowledge and literature review	Available groundwater data flow path of groundwater seasonal variation of groundwater-freshwater exchange	0.1	No	Model-based estimates with empirical checks	5.0 tons	8.0 tons	7.0 tons	0.7	Approximately 70%	domain knowledge and literature review	River hydrochemistry over the spatiotemporal scales Better field monitoring (especially CO2 fluxes) Better understanding of the river carbon cycling processes	0.1	No	Model-based estimates with empirical checks
y	Terrestrial biogeochemistry/geochemistry (incl. soil science) Freshwater biogeochemistry/geochemistry Other	NGO CDR focused	11-50%	<10%	<10%	<10%	11-50%	<10%	Olivine-rich (>50%) rock	0-10%	2	3	2	-0.1 Gt CO2e (net emission)	0.25 Gt CO2e (removal)	0.01 Gt CO2e (removal)	0.75	availability and mining potential ag land area	feasibility of expanding extraction and emissions burden of shipping it	0.5 tons	8.0 tons	5.0 tons	0.85	Approximately 90%	dissolution rates surface passivation cation sinks OC response	OC response cation sinks projected fertilizer input	0.35	Don't know	Fully empirical measurements	0.0 tons (none)	9.5 tons	4.0 tons	0.95	Approximately 200%	flowpaths secondary minerals groundwater chemistry	catchment scale cation losses baseline fluxes	0.35	Don't know	Tightly data constrained model	3.0 tons	9.5 tons	7.0 tons	0.8	Approximately 500%	OC-IC interactions effects of flow rate variability	better catchment scale datasets and models	0.35	Don't know	Tightly data constrained model
n	Terrestrial biogeochemistry/geochemistry (incl. soil science)	Academic	75% +	<10%	<10%	<10%	<10%	<10%	Basalt	76-100%	4	4	2	-0.1 Gt CO2e (net emission)	4 Gt CO2e (removal)	0 Gt CO2e (no impact)	0.9	Availability of basalt (high) data from lab and field experiments on weathering rates (e.g. derived from change in alkalinity of soil pore waters)	1) more field-based observations of mineral weathering rates with multiple methodologies 2) empirical constraints on organic carbon cycle responses (e.g. loss of soil organic carbon following rock amendment) 3) improved estimates of carbonate precipitation in streams and rivers	0.0 tons (none)	10.0 tons (all)	1.0 tons	1	Approximately 100%	Observed variability in rates of rock dissolution potential for strong acid weathering uncertainties about fate of cations sorbed to surface soils	1) Better methods for liquid-phase measurement of weathering products 2) field observations of in situ weathering rates in a greater diversity of ecosystems	0.5	Don't know	Fully empirical measurements	5.0 tons	10.0 tons (all)	7.5 tons	0.65	Approximately 100%	Base saturation and cation exchange capacity of soil in the example	We need more info about other potential fates for sorbed cations (e.g. incorporation into organo-mineral complexes)	0.1	Don't know	Tightly data constrained model	0.0 tons (none)	10.0 tons (all)	7.5 tons	1	Approximately 50%	Conflicting information I have read on calcite saturation state of rivers	Saturation state of calcium carbonate in small rivers and streams as well as the presence of calcite nucleation inhibitors in river waters	0.25	Don't know	Tightly data constrained model
n	Terrestrial biogeochemistry/geochemistry (incl. soil science)	Academic	75% +	<10%	<10%	<10%	<10%	<10%	Wollastonite	0-10%	1	4	2	-0.1 Gt CO2e (net emission)	0.1 Gt CO2e (removal)	0 Gt CO2e (no impact)	0.9	Availability of wollastonite (low) data from lab and field experiments on weathering rates (e.g. derived from change in alkalinity of soil pore waters)	1) more field-based observations of mineral weathering rates with multiple methodologies 2) empirical constraints on organic carbon cycle responses (e.g. loss of soil organic carbon following rock amendment) 3) improved estimates of carbonate precipitation in streams and rivers	0.0 tons (none)	10.0 tons (all)	1.0 tons	1	Approximately 100%	Observed variability in rates of rock dissolution potential for strong acid weathering uncertainties about fate of cations sorbed to surface soils	1) Better methods for liquid-phase measurement of weathering products 2) field observations of in situ weathering rates in a greater diversity of ecosystems	0.1	Don't know	Fully empirical measurements	5.0 tons	10.0 tons (all)	7.5 tons	0.65	Approximately 100%	Base saturation and cation exchange capacity of soil in the example	We need more info about other potential fates for sorbed cations (e.g. incorporation into organo-mineral complexes)	0.1	Don't know	Tightly data constrained model	0.0 tons (none)	10.0 tons (all)	7.5 tons	1	Approximately 50%	Conflicting information I have read on calcite saturation state of rivers	Saturation state of calcium carbonate in small rivers and streams as well as the presence of calcite nucleation inhibitors in river waters	0.25	Don't know	Tightly data constrained model
n	Terrestrial biogeochemistry/geochemistry (incl. soil science)	Academic	75% +	<10%	<10%	<10%	<10%	<10%	Olivine-rich (>50%) rock	0-10%	1	4	3	-0.1 Gt CO2e (net emission)	0.1 Gt CO2e (removal)	0 Gt CO2e (no impact)	0.9	Availability of olivine-rich rock (low) data from lab and field experiments on weathering rates (e.g. derived from change in alkalinity of soil pore waters)	1) more field-based observations of mineral weathering rates with multiple methodologies 2) empirical constraints on organic carbon cycle responses (e.g. loss of soil organic carbon following rock amendment) 3) improved estimates of carbonate precipitation in streams and rivers	0.0 tons (none)	10.0 tons (all)	4.0 tons	1	Approximately 100%	Observed variability in rates of rock dissolution (although olivine will dissolve much faster than e.g. basalt) potential for strong acid weathering uncertainties about fate of cations sorbed to surface soils	1) Better methods for liquid-phase measurement of weathering products 2) field observations of in situ weathering rates in a greater diversity of ecosystems	0.1	Don't know	Fully empirical measurements	5.0 tons	10.0 tons (all)	7.5 tons	0.65	Approximately 100%	Base saturation and cation exchange capacity of soil in the example	We need more info about other potential fates for sorbed cations (e.g. incorporation into organo-mineral complexes formation of secondary minerals)	0.1	Don't know	Tightly data constrained model	0.0 tons (none)	10.0 tons (all)	7.5 tons	1	Approximately 50%	Conflicting information I have read on calcite saturation state of rivers	Saturation state of calcium carbonate in small rivers and streams as well as the presence of calcite nucleation inhibitors in river waters	0.25	Don't know	Tightly data constrained model
n	Terrestrial biogeochemistry/geochemistry (incl. soil science)	Academic	75% +	<10%	<10%	<10%	<10%	<10%	Steel slag	0-10%	2	4	3	-0.1 Gt CO2e (net emission)	2.0 Gt CO2e (removal)	0 Gt CO2e (no impact)	0.9	Potential for trace metal contamination limiting magnitude of deployment data from lab and field experiments on weathering rates (although there are fewer experiments for this feedstock))	1) better constraints on the availability and chemical composition of this feedstock 2) empirical constraints on organic carbon cycle responses (e.g. loss of soil organic carbon following rock amendment) 3) improved estimates of carbonate precipitation in streams and rivers	0.0 tons (none)	10.0 tons (all)	1.0 tons	1	Approximately 100%	Observed variability in rates of rock dissolution potential for strong acid weathering uncertainties about fate of cations sorbed to surface soils	1) Better methods for liquid-phase measurement of weathering products 2) field observations of in situ weathering rates in a greater diversity of ecosystems	0.5	Yes	Fully empirical measurements	5.0 tons	10.0 tons (all)	7.5 tons	0.65	Approximately 100%	Base saturation and cation exchange capacity of soil in the example	We need more info about other potential fates for sorbed cations (e.g. incorporation into organo-mineral complexes)	0.25	Don't know	Tightly data constrained model	0.0 tons (none)	10.0 tons (all)	7.5 tons	1	Approximately 50%	Conflicting information I have read on calcite saturation state of rivers	Saturation state of calcium carbonate in small rivers and streams as well as the presence of calcite nucleation inhibitors in river waters	0.25	Don't know	Tightly data constrained model
n	Terrestrial biogeochemistry/geochemistry (incl. soil science)	Academic	75% +	<10%	<10%	<10%	<10%	<10%	Concrete waste	0-10%	2	4	3	-0.1 Gt CO2e (net emission)	2.0 Gt CO2e (removal)	0 Gt CO2e (no impact)	0.9	Potential for trace metal contamination limiting magnitude of deployment data from lab and field experiments on weathering rates (although there are fewer experiments for this feedstock)	1) better constraints on the availability and chemical composition of this feedstock 2) empirical constraints on organic carbon cycle responses (e.g. loss of soil organic carbon following rock amendment) 3) improved estimates of carbonate precipitation in streams and rivers	0.0 tons (none)	10.0 tons (all)	1.0 tons	1	Approximately 100%	Observed variability in rates of rock dissolution potential for strong acid weathering uncertainties about fate of cations sorbed to surface soils	1) Better methods for liquid-phase measurement of weathering products 2) field observations of in situ weathering rates in a greater diversity of ecosystems	0.5	Yes	Fully empirical measurements	5.0 tons	10.0 tons (all)	7.5 tons	0.65	Approximately 100%	Base saturation and cation exchange capacity of soil in the example	We need more info about other potential fates for sorbed cations (e.g. incorporation into organo-mineral complexes)	0.25	Don't know	Tightly data constrained model	0.0 tons (none)	10.0 tons (all)	7.5 tons	1	Approximately 50%	Conflicting information I have read on calcite saturation state of rivers	Saturation state of calcium carbonate in small rivers and streams as well as the presence of calcite nucleation inhibitors in river waters	0.25	Don't know	Tightly data constrained model
n	Terrestrial biogeochemistry/geochemistry (incl. soil science)	Academic	75% +	<10%	<10%	<10%	<10%	<10%	Agricultural Lime	0-10%	5	1	3	-0.5 Gt CO2e (net emission)	1 Gt CO2e (removal)	0 Gt CO2e (no impact)	0.7	1) Existing body of research on changes in organic carbon cycling under liming 2) chemistry of CaCO3 dissolution under neutral and acidic conditions (the former can produce a small and temporary C sink the latter is always a CO2 source)	1) Better constraints on potential for strong acid weathering in various ecosystem 2) better understanding of organic carbon cycle responses (e.g. potential for SOC loss or gain with liming)	0.0 tons (none)	10.0 tons (all)	0.0 tons (none)	1	Approximately 100%	Soil pH in example	A lot depends on partial pressure of CO2 in the soil and presence of non-carbonic acids especially for pH < 6.1	0.15	Don't know	Fully empirical measurements	5.0 tons	10.0 tons (all)	7.5 tons	0.65	Approximately 100%	Base saturation and cation exchange capacity of soil in the example	We need more info about other potential fates for sorbed cations (e.g. incorporation into organo-mineral complexes)	0.1	Don't know	Tightly data constrained model	0.0 tons (none)	10.0 tons (all)	7.5 tons	1	Approximately 50%	Conflicting information I have read on calcite saturation state of rivers	Saturation state of calcium carbonate in small rivers and streams as well as the presence of calcite nucleation inhibitors in river waters	0.25	Don't know	Tightly data constrained model
y	Terrestrial biogeochemistry/geochemistry (incl. soil science)	Academic	11-50%	<10%	<10%	<10%	<10%	<10%	Agricultural Lime	0-10%	5	3	4	-0.75 Gt CO2e (removal)	0.5 Gt CO2e (removal)	0.01 Gt CO2e (removal)	0.6	estimated feedstock availability properties of areas that would be considered non-additional (strong acid weathering) production/transport emissions	better mapping of places lime could be applied that would be considered additional (not already being limed) the pH/pCO2 of those locations to get a better idea of the impact of strong acid weathering	1.5 tons	10.0 tons (all)	8.0 tons	0.9	Approximately 70%	non-carbonic acid weathering and the generation of co2 by strong acid weathering of carbonate minerals	better ways to measure in situ pH and pCO2 and correct estimated bicarbonate production based on weathering rates for carbonate speciation or to be able to directly measure alkalinity export	0.1	No	Fully empirical measurements	8.0 tons	10.0 tons (all)	8.5 tons	0.7	Approximately 30%	potential for carbonate precipitation	information on deep soils properties and modeling of deep soil processes	0	No	Tightly data constrained model	9.0 tons	10.0 tons (all)	9.5 tons	0.85	Approximately 30%	potential for carbonate precipitation (degassing due to re-equilibration with atmospheric pCO2 not likely to have large impact on efficiency)	more localized data on initial river chemistry conditions to improve modeling	0.15	Don't know	Fully model-based
y	Terrestrial biogeochemistry/geochemistry (incl. soil science)	Academic	11-50%	<10%	<10%	<10%	<10%	<10%	Concrete waste	0-10%	3	3	4	-0.25 Gt CO2e (net emission)	0.25 Gt CO2e (removal)	0.01 Gt CO2e (removal)	0.6	estimated feedstock availability amount of carbonate in concrete strong acid weathering	better estimation of globally available feedstock and composition better understanding of how it would interact with liming practices to determine additionality at potential application locations the pH/pCO2 of those locations to get a better idea of the impact of strong acid weathering	2.0 tons	10.0 tons (all)	9.0 tons	0.9	Approximately 70%	non-carbonic acid weathering what portion of material is carbonate	better ways to measure in situ pH and pCO2 and correct estimated bicarbonate production based on weathering rates for carbonate speciation or to be able to directly measure alkalinity export	0.15	Don't know	Fully empirical measurements	8.5 tons	10.0 tons (all)	9.0 tons	0.7	Approximately 30%	potential for carbonate precipitation	information on deep soils properties and modeling of deep soil processes	0	No	Tightly data constrained model	9.0 tons	10.0 tons (all)	9.5 tons	0.85	Approximately 30%	potential for carbonate precipitation (degassing due to re-equilibration with atmospheric pCO2 not likely to have large impact on efficiency)	more localized data on initial river chemistry conditions to improve modeling	0.15	Don't know	Fully model-based
y	Freshwater biogeochemistry/geochemistry	Academic	<10%	<10%	<10%	<10%	<10%	<10%	Basalt	0-10%	5	3	4	0.01 Gt CO2e (net removal)	0.25 Gt CO2e (removal)	0.1 Gt CO2e (removal)	0.75	mining rates mining emissions weathering efficiency	organic carbon response microbial response	5.5 tons	8.5 tons	6.0 tons	0.8	Approximately 50%	carbonate precipitation direct re-emission	pH gradients microbial response hydrological conditions	0.3	No	Tightly data constrained model	3.5 tons	7.5 tons	4.5 tons	0.7	Approximately 100%	carbonate precipitation Ca-Mg ratios aquifer recharge rates	aquifer recharge rates	0.2	No	Tightly data constrained model	4.5 tons	7.0 tons	6.0 tons	0.75	Approximately 70%	CO2 outgassing inorganic carbonate system Ca-Mg ratios	gas exchange coefficients microbial response DIC & DOC leaching	0.2	No	Tightly data constrained model
y	Freshwater biogeochemistry/geochemistry	Academic	<10%	<10%	<10%	<10%	<10%	<10%	Wollastonite	0-10%	2	4	3	0 Gt CO2e (no impact)	0.1 Gt CO2e (removal)	0.01 Gt CO2e (removal)	0.75	mining rates mining emissions weathering efficiency	organic carbon response microbial response river carbon dynamics	6.0 tons	8.5 tons	7.0 tons	0.75	Approximately 50%	carbonate precipitation direct re-emission	pH gradients microbial response hydrological conditions	0.4	Don't know	Tightly data constrained model	4.0 tons	8.5 tons	5.0 tons	0.65	Approximately 100%	carbonate precipitation Ca-Mg ratios aquifer recharge rates	microbial response aquifer recharge rates	0.3	No	Tightly data constrained model	5.5 tons	8.0 tons	7.0 tons	0.7	Approximately 70%	CO2 outgassing inorganic carbonate system Ca-Mg ratios	gas exchange coefficients microbial response DIC & DOC leaching	0.3	No	Tightly data constrained model
y	Freshwater biogeochemistry/geochemistry	Academic	<10%	<10%	<10%	<10%	<10%	<10%	Olivine-rich (>50%) rock	0-10%	4	4	4	0 Gt CO2e (no impact)	0.25 Gt CO2e (removal)	0.1 Gt CO2e (removal)	0.75	mining rates mining emissions weathering efficiency	organic carbon response microbial response river carbon dynamics	6.0 tons	9.0 tons	7.5 tons	0.75	Approximately 50%	carbonate precipitation direct re-emission	pH gradients microbial response hydrological conditions	0.4	Don't know	Tightly data constrained model	4.0 tons	9.0 tons	5.5 tons	0.65	Approximately 100%	carbonate precipitation Ca-Mg ratios aquifer recharge rates	aquifer recharge rates	0.4	Don't know	Tightly data constrained model	4.0 tons	7.0 tons	5.0 tons	0.7	Approximately 70%	CO2 outgassing inorganic carbonate system Ca-Mg ratios	gas exchange coefficients microbial response DIC & DOC leaching	0.3	No	Tightly data constrained model
y	Freshwater biogeochemistry/geochemistry	Academic	<10%	<10%	<10%	<10%	<10%	<10%	Steel slag	0-10%	3	2	2	0.01 Gt CO2e (net removal)	0.1 Gt CO2e (removal)	0.01 Gt CO2e (removal)	0.7	mining rates mining emissions weathering efficiency	organic carbon response microbial response river carbon dynamics	4.5 tons	7.0 tons	6.5 tons	0.7	Approximately 50%	carbonate precipitation direct re-emission	pH gradients microbial response hydrological conditions	0.7	Yes	Tightly data constrained model	3.5 tons	7.5 tons	4.5 tons	0.65	Approximately 100%	carbonate precipitation Ca-Mg ratios aquifer recharge rates	aquifer recharge rates	0.6	Yes	Tightly data constrained model	6.0 tons	9.0 tons	7.5 tons	0.65	Approximately 70%	CO2 outgassing inorganic carbonate system Ca-Mg ratios	gas exchange coefficients microbial response DIC & DOC leaching	0.5	Yes	Tightly data constrained model
y	Freshwater biogeochemistry/geochemistry	Academic	<10%	<10%	<10%	<10%	<10%	<10%	Agricultural Lime	0-10%	5	2	2	-1 Gt CO2e (net emission)	0.01 Gt CO2e (removal)	-0.1 Gt CO2e (net emission)	0.7	mining rates mining emissions weathering efficiency	organic carbon response microbial response river carbon dynamics	0.5 tons	3.0 tons	2.0 tons	0.8	Approximately 50%	carbonate precipitation direct re-emission	pH gradients microbial response hydrological conditions	0.5	No	Tightly data constrained model	4.0 tons	7.5 tons	6.0 tons	0.7	Approximately 100%	carbonate precipitation Ca-Mg ratios aquifer recharge rates	aquifer recharge rates	0.4	No	Tightly data constrained model	6.5 tons	9.0 tons	7.5 tons	0.75	Approximately 70%	CO2 outgassing inorganic carbonate system Ca-Mg ratios	gas exchange coefficients microbial response DIC & DOC leaching	0.3	No	Tightly data constrained model
y	Freshwater biogeochemistry/geochemistry	Academic	<10%	<10%	<10%	<10%	<10%	<10%	Concrete waste	0-10%	4	2	2	-0.01 Gt CO2e (net emission)	0.1 Gt CO2e (removal)	0.01 Gt CO2e (removal)	0.7	mining rates mining emissions weathering efficiency	organic carbon response microbial response river carbon dynamics	2.5 tons	7.0 tons	5.5 tons	0.7	Approximately 50%	carbonate precipitation direct re-emission	pH gradients microbial response hydrological conditions	0.8	Yes	Tightly data constrained model	3.0 tons	6.5 tons	5.0 tons	0.65	Approximately 100%	carbonate precipitation Ca-Mg ratios aquifer recharge rates	aquifer recharge rates	0.7	Yes	Tightly data constrained model	4.0 tons	6.5 tons	4.5 tons	0.65	Approximately 70%	CO2 outgassing inorganic carbonate system Ca-Mg ratios	gas exchange coefficients microbial response DIC & DOC leaching	0.6	Yes	Tightly data constrained model
n	Marine biogeochemistry/geochemistry	Academic	75% +		11-50%				Basalt	76-100%	5	4	2	0.5 Gt CO2e (removal)	4 Gt CO2e (removal)	2.0 Gt CO2e (removal)	0.8	ease of implementation rate of weathering fate of weathering products	cation exchange capacity (retention) on soils following implementation fate of alkalinity (HCO3-) produced during weathering LCA emission estimates (mining/grinding/transportation/water availability etc)	0.5 tons	5.0 tons	2.0 tons	0.8	Approximately 100%	spatial variability in CEC/soil composition (inc. as a function of past soil amendment practices)	weathering rate of the applied basalt composition of the soils (& their heterogeneity)	0.4	Don't know	Model-based estimates with empirical checks	0.5 tons	8.0 tons	5.0 tons	0.7	Approximately 200%	variabile depth of this zone (& hence how much soil is present for the released cations to exchange onto + alkalinity to be absorbed/precipitated in) uncertainties in water flux rates (mineral saturation state depends on groundwater flux) variable initial composition of groundwater/soils (depending on up-catchment practices + prior soil treatments)	as above understanding depth + prior treatment of the soils.	0.1	No	Model-based estimates with empirical checks	5.0 tons	9.5 tons	8.5 tons	0.85	Approximately 30%	ease of measuring (can do repeated real-time down-stream monitoring if needed) ease of constraining models with measured parameters uncertainties/variations in length of flow path + potential for different river compositions (different bedrock compositions)	need to constrain length/timescale of Flow & potential for degassing (change in pH due to other inputs etc)	0.25	Don't know	Model-based estimates with empirical checks
n	Marine biogeochemistry/geochemistry	Academic	75% +		11-50%				Wollastonite	0-10%	1	4	3	0.1 Gt CO2e (removal)	2.0 Gt CO2e (removal)	0.5 Gt CO2e (removal)	0.55	lack of availability cost of implementation rate of weathering	knowledge of where it can be extracted and applied weathering rates	2.0 tons	8.0 tons	4.0 tons	0.55	Approximately 100%			0.5	Don't know	Model-based estimates with empirical checks	1.0 tons	8.0 tons	4.0 tons	0.7	Approximately 200%	depth of soils cec capacity	depth of soils cec capacity	0.2	Don't know	Model-based estimates with empirical checks	5.0 tons	9.0 tons	8.0 tons	0.7	Approximately 30%	ability to measure and model flow path	flow path length & composition of waters	0.2	Don't know	Model-based estimates with empirical checks
n	Marine biogeochemistry/geochemistry	Academic	75% +		11-50%				Olivine-rich (>50%) rock	11-50%	1	4	2	0.1 Gt CO2e (removal)	3 Gt CO2e (removal)	1.5 Gt CO2e (removal)	0.8	availability of olivine transportation/mining costs weathering rate	improved LCA and knowledge of weathering rate in different environments	0.5 tons	6.0 tons	2.5 tons	0.75	Approximately 90%	cation exchange capacity of the soils soil heterogeneity rate of weathering	weathering rates soil composition	0.6	Yes	Model-based estimates with empirical checks	1.0 tons	5.0 tons	2.0 tons	0.6	Approximately 100%	depth of soil zone rate of water flow heterogeneity in soil exchange capacity	improved characterisation of the above	0.25	Don't know	Model-based estimates with empirical checks	5.0 tons	9.0 tons	7.0 tons	0.7	Approximately 30%	ability to measure directly uncertainties in flow path length/duration potential for other inputs (e.g. low-pH rivers that drive degassing)	improved understanding of flow path duration/timescale	0.25	Don't know	Model-based estimates with empirical checks
n	Marine biogeochemistry/geochemistry	Academic	75% +		11-50%				Steel slag	0-10%	4	2	2	0.1 Gt CO2e (removal)	3 Gt CO2e (removal)	1.5 Gt CO2e (removal)	0.5			0.5 tons	4.0 tons	1.0 tons	0.5	Approximately 100%			0.5	Yes	Model-based estimates with empirical checks	1.0 tons	5.0 tons	3.0 tons	0.55	Approximately 100%			0.35	Don't know	Model-based estimates with empirical checks	5.0 tons	9.5 tons	8.0 tons	0.6	Approximately 70%			0.35	Yes	Model-based estimates with empirical checks
n	Marine biogeochemistry/geochemistry	Academic	75% +		11-50%				Agricultural Lime	0-10%	5	2	4	0.1 Gt CO2e (removal)	4 Gt CO2e (removal)	2.0 Gt CO2e (removal)	0.7	availablity of material uncertainty over permanence of sequestration (how long the bicarbonate will remain in the oceans)		1.0 tons	7.0 tons	4.0 tons	0.65	Approximately 100%	high dissolution rates uncertainty over soil depth and heterogeneity in CEC		0.1	No	Model-based estimates with empirical checks	2.0 tons	7.0 tons	4.5 tons	0.65	Approximately 100%			0.05	No	Model-based estimates with empirical checks	5.0 tons	9.0 tons	7.5 tons	0.6	Approximately 50%			0.05	No	Model-based estimates with empirical checks
n	Marine biogeochemistry/geochemistry	Academic	75% +		11-50%				Concrete waste	0-10%	5	2	4	0.1 Gt CO2e (removal)	2.5 Gt CO2e (removal)	1 Gt CO2e (removal)	0.55			0.5 tons	4.5 tons	1.5 tons	0.55	Approximately 100%			0.4	Don't know	Model-based estimates with empirical checks	1.0 tons	5.0 tons	2.0 tons	0.55	Approximately 200%			0.2	Don't know	Model-based estimates with empirical checks	5.0 tons	9.0 tons	8.0 tons	0.6	Approximately 90%			0.2	Don't know	Model-based estimates with empirical checks
y	Terrestrial biogeochemistry/geochemistry (incl. soil science) Marine biogeochemistry/geochemistry	Academic	11-50%	11-50%	<10%	<10%	11-50%	<10%	Basalt	11-50%	4	4	2	0.1 Gt CO2e (removal)	3 Gt CO2e (removal)	1.5 Gt CO2e (removal)	0.6	cropland area transport emissions capture capacity of basalt	area where basalt can be applied without much transportation emissions side effects on other GHGs as well as SOM basalt dissolution kinetics including precipitation of carbonate	0.0 tons (none)	6.0 tons	4.0 tons	0.65	Approximately 100%	cation exchange capacity basalt dissolution kinetics initial soil conditions (soil pH and basesaturation)	change in cation exchange capacity with time tracking weathering products including solid phase (particle size distribution 2ndary pahses) and aqueous phase (some tracer) change in reaction kinetics with time	0.1	Don't know	Model-based estimates with empirical checks	0.0 tons (none)	7.0 tons	5.0 tons	0.55	Approximately 200%	cation exchange capacity depth to water table base saturation	water residence time (depth to water table + net water flux) change in base saturation and CEC with depth gas diffusivity (moisture level)	0.1	Don't know	Tightly data constrained model	8.0 tons	10.0 tons (all)	9.0 tons	0.65	Approximately 100%	river chemistry water residence time	river hydrological network carbonate precipitation anthropogenic acid input (e.g. sewage)	0.1	Don't know	Tightly data constrained model
y	Terrestrial biogeochemistry/geochemistry (incl. soil science) Marine biogeochemistry/geochemistry	Academic	11-50%	11-50%	<10%	<10%	11-50%	<10%	Wollastonite	11-50%	1	5	3	0 Gt CO2e (no impact)	0.1 Gt CO2e (removal)	0.01 Gt CO2e (removal)	0.55	available amount of feedstock	future scenario for available amount of feedstock and location of mining positive/negative side effects on SOM	4.0 tons	8.0 tons	6.0 tons	0.65	Approximately 100%	rooting depth cation exchange properties feedstock dissolution kinetics	change in cation exchange capacity with time tracking weathering products including solid phase (particle size distribution 2ndary pahses) and aqueous phase (some tracer) change in reaction kinetics with time	0.1	Don't know	Model-based estimates with empirical checks	0.0 tons (none)	7.0 tons	5.0 tons	0.55	Approximately 200%	cation exchange capacity depth to water table base saturation	water residence time (depth to water table + net water flux) change in base saturation and CEC with depth gas diffusivity (moisture level)	0.1	Don't know	Tightly data constrained model	8.0 tons	10.0 tons (all)	9.0 tons	0.65	Approximately 100%	river chemistry water residence time	river hydrological network carbonate precipitation anthropogenic acid input (e.g. sewage)	0.1	Don't know	Tightly data constrained model
y	Terrestrial biogeochemistry/geochemistry (incl. soil science) Marine biogeochemistry/geochemistry	Academic	11-50%	11-50%	<10%	<10%	11-50%	<10%	Basalt	11-50%	2	4	2	-1 Gt CO2e (net emission)	4 Gt CO2e (removal)	0.5 Gt CO2e (removal)	0.55	cropland area potential side effects of trace elements dissolution kinetics	side effects on other GHGs as well as SOM How much of olivine will be available	0.0 tons (none)	8.0 tons	5.0 tons	0.6	Approximately 100%	cation exchange capacity dissolution kinetics initial soil conditions (soil pH and basesaturation)	change in cation exchange capacity with time tracking weathering products including solid phase (particle size distribution 2ndary pahses) and aqueous phase (some tracer) change in reaction kinetics with time	0.3	Don't know	Model-based estimates with empirical checks	0.0 tons (none)	7.0 tons	5.0 tons	0.55	Approximately 200%	cation exchange capacity depth to water table base saturation	water residence time (depth to water table + net water flux) change in base saturation and CEC with depth gas diffusivity (moisture level)	0.3	Don't know	Tightly data constrained model	7.0 tons	10.0 tons (all)	9.0 tons	0.6	Approximately 100%	river chemistry water residence time	river hydrological network carbonate precipitation anthropogenic acid input (e.g. sewage)	0.3	Don't know	Tightly data constrained model
y	Terrestrial biogeochemistry/geochemistry (incl. soil science) Marine biogeochemistry/geochemistry	Academic	11-50%	11-50%	<10%	<10%	11-50%	<10%	Steel slag	0-10%	4	4	3	0.5 Gt CO2e (removal)	2.0 Gt CO2e (removal)	0.5 Gt CO2e (removal)	0.5	processing emissions chemical and mineral characteristics of steel slag dissolution kinetics of steel slag	processing emissions chemical and mineral characteristics of steel slag dissolution kinetics of steel slag	4.0 tons	8.0 tons	6.0 tons	0.55	Approximately 100%	rooting depth cation exchange properties feedstock dissolution kinetics	change in cation exchange capacity with time tracking weathering products including solid phase (particle size distribution 2ndary pahses) and aqueous phase (some tracer) change in reaction kinetics with time	0.35	Yes	Model-based estimates with empirical checks	0.0 tons (none)	7.0 tons	5.0 tons	0.55	Approximately 200%	cation exchange capacity depth to water table base saturation	water residence time (depth to water table + net water flux) change in base saturation and CEC with depth gas diffusivity (moisture level)	0.35	Yes	Tightly data constrained model	8.0 tons	10.0 tons (all)	9.0 tons	0.6	Approximately 100%	river chemistry water residence time	river hydrological network carbonate precipitation anthropogenic acid input (e.g. sewage)	0.35	Yes	Tightly data constrained model
y	Terrestrial biogeochemistry/geochemistry (incl. soil science) Marine biogeochemistry/geochemistry	Academic	11-50%	11-50%	<10%	<10%	11-50%	<10%	Concrete waste	0-10%	4	4	3	0.1 Gt CO2e (removal)	1.5 Gt CO2e (removal)	0.75 Gt CO2e (removal)	0.5	production rate of concrete waste chemical and mineral characteristics of concrete waste dissolution kinetics	production rate of concrete waste chemical and mineral characteristics of concrete waste dissolution kinetics	4.0 tons	8.0 tons	6.0 tons	0.55	Approximately 100%	rooting depth cation exchange properties feedstock dissolution kinetics	change in cation exchange capacity with time tracking weathering products including solid phase (particle size distribution 2ndary pahses) and aqueous phase (some tracer) change in reaction kinetics with time	0.2	Yes	Model-based estimates with empirical checks	0.0 tons (none)	7.0 tons	5.0 tons	0.55	Approximately 200%	cation exchange capacity depth to water table base saturation	water residence time (depth to water table + net water flux) change in base saturation and CEC with depth gas diffusivity (moisture level)	0.2	Yes	Tightly data constrained model	8.0 tons	10.0 tons (all)	9.0 tons	0.6	Approximately 100%	river chemistry water residence time	river hydrological network carbonate precipitation anthropogenic acid input (e.g. sewage)	0.35	Yes	Tightly data constrained model
y	Terrestrial biogeochemistry/geochemistry (incl. soil science) Marine biogeochemistry/geochemistry	Academic	11-50%	11-50%	<10%	<10%	11-50%	<10%	Agricultural Lime	11-50%	4	1	3	-1.5 Gt CO2e	2.0 Gt CO2e (removal)	1 Gt CO2e (removal)	0.55	river saturation limit ocean leakage emisson from reaction with strong acids	river saturation limit ocean leakage emisson from reaction with strong acids	0.0 tons (none)	8.0 tons	4.0 tons	0.6	Approximately 100%	rooting depth cation exchange properties existence of strong acids	change in cation exchange capacity with time tracking weathering products including solid phase (particle size distribution 2ndary pahses) and aqueous phase (some tracer) effects of strong acids	0.1	Don't know	Model-based estimates with empirical checks	0.0 tons (none)	7.0 tons	5.0 tons	0.55	Approximately 200%	cation exchange capacity depth to water table base saturation	water residence time (depth to water table + net water flux) change in base saturation and CEC with depth gas diffusivity (moisture level)	0.1	Don't know	Tightly data constrained model	7.0 tons	10.0 tons (all)	8.5 tons	0.55	Approximately 100%	river chemistry water residence time	river hydrological network carbonate precipitation anthropogenic acid input (e.g. sewage)	0.1	Don't know	Tightly data constrained model
n	Terrestrial biogeochemistry/geochemistry (incl. soil science)	Academic	75% +	<10%	<10%	<10%	<10%	<10%	Basalt	76-100%	4	3	2	-0.5 Gt CO2e (net emission)	2.0 Gt CO2e (removal)	0.5 Gt CO2e (removal)	0.7	Laboratory-based experimental weathering rates soil exchange and cation transport lag times lifecycle emissions (e.g. transport and spreading) relative to current extent of liming.	Better constraints on in-field weathering rates more results from long-term trials more government policies on CDR practices / ERW as an agronomic practice to gauge upscaling timeline/trajectory	0.0 tons (none)	4.0 tons	1.5 tons	0.7	Approximately 200%	Uncertainties in measuring in-field weathering rates given spatial heterogeneity in soil composition relative to uncertainty on cation transport through soils.	Techniques for measuring dissolution of material in-field better understanding of partitioning of cations in solid/solute phases in soil column after dissolution better long-term accounting of acidity and ions in soil system.	0.1	Don't know	Tightly data constrained model	4.0 tons	9.5 tons	9.0 tons	0.7	Approximately 200%	Relative difficulty in measuring groundwater solute phase composition and chemical processes.	More data on groundwater chemical fluxes better integration of processes like vadose zone respiration and mineralisation into transport models.	0.1	Don't know	Model-based estimates with empirical checks	3.0 tons	10.0 tons (all)	9.0 tons	0.9	Approximately 90%	Relative ease of measuring and modelling river chemistry and transport processes monitoring infrastructure interplay between saturation state flow and chemical solute concentration in major river system draining Midwest..	Continuation of water chemistry monitoring through sites such as USGS stations (and expansion of capacity of such sites elsewhere in the world).	0.05	No	Model-based estimates with empirical checks
n	Terrestrial biogeochemistry/geochemistry (incl. soil science)	Academic	75% +	<10%	<10%	<10%	<10%	<10%	Wollastonite	0-10%	1	4	4	-0.01 Gt CO2e (net emission)	0.01 Gt CO2e (removal)	0 Gt CO2e (no impact)	0.8	Abundance of wollastonite deposit globally and likely constraints on scaling laboratory-based weathering rates chemical formula.	Better constraints on in-field weathering rates (and laboratory rates in the case of wollastonite) more work on resource mapping for wollastonite.	0.0 tons (none)	6.0 tons	3.0 tons	0.7	Approximately 200%	Feedstock weathering rate in laboratory settings relative to others secondary mineral formation processes relative to other feedstocks cation transport through soils and uncertainties in measurement.	Techniques for measuring dissolution of material in-field and secondary mineral formation understanding of cations.	0.05	No	Tightly data constrained model	5.0 tons	10.0 tons (all)	9.0 tons	0.7	Approximately 200%	Compositional homogeneity of feedstock (relative lack of cations other than Ca) relative difficulty in measuring groundwater solute phase composition and chemical processes.	More data on groundwater chemical fluxes better integration of processes like vadose zone respiration and mineralisation into transport models.	0.05	No	Model-based estimates with empirical checks	3.0 tons	10.0 tons (all)	9.0 tons	0.9	Approximately 90%	Relative ease of measuring and modelling river chemistry and transport processes monitoring infrastructure interplay between saturation state flow and chemical solute concentration in major river system draining Midwest..	Continuation of water chemistry monitoring through sites such as USGS stations (and expansion of capacity of such sites elsewhere in the world).	0.05	No	Model-based estimates with empirical checks
n	Terrestrial biogeochemistry/geochemistry (incl. soil science)	Academic	75% +	<10%	<10%	<10%	<10%	<10%	Olivine-rich (>50%) rock	0-10%	2	4	2	-0.25 Gt CO2e (net emission)	0.5 Gt CO2e (removal)	0.1 Gt CO2e (removal)	0.7	Distribution of olivine-rich rock deposits and carbon cost of extraction and transport weathering rates in laboratory settings.	Better constraints on in-field weathering rates more work on resource mapping for peridotites.	0.0 tons (none)	6.0 tons	2.0 tons	0.6	Approximately 200%	Dissolution rate in laboratory experiments susceptibility to passivation cations released and their likely interaction with soils/ secondary phase precipitation.	Techniques for measuring dissolution of material in-field better understanding of partitioning of cations in solid/solute phases in soil column after dissolution better long-term accounting of acidity and ions in soil system.	0.6	Yes	Tightly data constrained model	4.0 tons	9.5 tons	9.0 tons	0.7	Approximately 200%	Composition in feedstock relative difficulty in measuring groundwater solute phase composition and chemical processes.	More data on groundwater chemical fluxes better integration of processes like vadose zone respiration and mineralisation into transport models.	0.4	Yes	Model-based estimates with empirical checks	3.0 tons	10.0 tons (all)	9.0 tons	0.9	Approximately 90%	Relative ease of measuring and modelling river chemistry and transport processes monitoring infrastructure interplay between saturation state flow and chemical solute concentration in major river system draining Midwest.	Continuation of water chemistry monitoring through sites such as USGS stations (and expansion of capacity of such sites elsewhere in the world).	0.2	Don't know	Model-based estimates with empirical checks
n	Terrestrial biogeochemistry/geochemistry (incl. soil science)	Academic	75% +	<10%	<10%	<10%	<10%	<10%	Steel slag	0-10%	2	3	3	-0.01 Gt CO2e (net emission)	0.25 Gt CO2e (removal)	0.1 Gt CO2e (removal)	0.7	Abundance of material regulatory ease to allow widespread use as agronomic amendments composition for projection of CDR potential and weathering rate.	Life-cycle assessment more studies of mineralogy of slag materials and their distribution and production.	0.0 tons (none)	7.0 tons	2.0 tons	0.6	Approximately 200%	Dissolution rate composition and heterogeneity of material and CDR potential cations released and their likely interaction with soils/ secondary phase precipitation.	Better understanding of partitioning of cations in solid/solute phases in soil column after dissolution better long-term accounting of acidity and ions in soil system.	0.4	Yes	Model-based estimates with empirical checks	3.0 tons	9.5 tons	7.0 tons	0.7	Approximately 200%	Composition of feedstock (ability to charge-balance bicarbonate) relative difficulty in measuring groundwater solute phase composition and chemical processes.	More data on groundwater chemical fluxes better integration of processes like vadose zone respiration and mineralisation into transport models.	0.2	Yes	Model-based estimates with empirical checks	3.0 tons	10.0 tons (all)	9.0 tons	0.9	Approximately 90%	Relative ease of measuring and modelling river chemistry and transport processes monitoring infrastructure interplay between saturation state flow and chemical solute concentration in major river system draining Midwest.	Continuation of water chemistry monitoring through sites such as USGS stations (and expansion of capacity of such sites elsewhere in the world).	0.1	Don't know	Model-based estimates with empirical checks
n	Terrestrial biogeochemistry/geochemistry (incl. soil science)	Academic	75% +	<10%	<10%	<10%	<10%	<10%	Agricultural Lime	0-10%	5	2	5	< -2 Gt CO2e (net emission)	> 5 Gt CO2e (removal)	2.0 Gt CO2e (removal)	1	Current liming extent (i.e. counterfactuals) sources of acidity contributing to carbonate dissolution future fertiliser use scenarios.	Constraints (e.g. from isotope systems) on sources of bicarbonate load in rivers time series of water chemistry data from large rivers data on agricultural liming practices.	0.0 tons (none)	5.0 tons	2.0 tons	0.7	Approximately 200%	Relating pH and buffering capacity change to concentration of bicarbonate alkalinity in solution charge-balancing cations and their likelihood of forming secondary phases.	Better understanding of partitioning of cations in solid/solute phases in soil column after dissolution better long-term accounting of acidity and ions in soil system accurate information on strong acid addition to fields from nitrogen fertiliser application and nitrification.	0.05	No	Model-based estimates with empirical checks	2.0 tons	9.0 tons	7.0 tons	0.6	Approximately 200%	Bicarbonate flux to vadose zone relative to cation flux from dissolution of carbonates uncertainty in chemical environment of lower vadose zone with respect to CO2 concentration and pH.	More data on groundwater chemical fluxes better integration of processes like vadose zone respiration and mineralisation into transport models.	0	No	Model-based estimates with empirical checks	3.0 tons	9.5 tons	9.0 tons	0.9	Approximately 100%	Relative ease of measuring and modelling river chemistry and transport processes monitoring infrastructure interplay between saturation state flow and chemical solute concentration in major river system draining Midwest..	Continuation of water chemistry monitoring through sites such as USGS stations (and expansion of capacity of such sites elsewhere in the world).	0	No	Model-based estimates with empirical checks
n	Terrestrial biogeochemistry/geochemistry (incl. soil science)	Academic	75% +	<10%	<10%	<10%	<10%	<10%	Concrete waste	0-10%	4	3	5	-0.1 Gt CO2e (net emission)	1.5 Gt CO2e (removal)	0.5 Gt CO2e (removal)	0.7	Abundance of waste cement/concrete products and barriers to use as agricultural amendment (legal or other) composition (ratio of carbonates to silicates to oxides) sources of acidity contributing to carbonate dissolution future fertiliser use scenarios.	Better mineralogical control on cement compositions time series of water chemistry data from large rivers data on agricultural liming practices.	0.0 tons (none)	6.0 tons	2.5 tons	0.7	Approximately 200%	Relating pH and buffering capacity change to concentration of bicarbonate alkalinity in solution charge-balancing cations and their likelihood of forming secondary phases.	Better understanding of partitioning of cations in solid/solute phases in soil column after dissolution better long-term accounting of acidity and ions in soil system accurate information on strong acid addition to fields from nitrogen fertiliser application and nitrification.	0.1	Don't know	Tightly data constrained model	2.0 tons	9.0 tons	7.0 tons	0.6	Approximately 200%	Bicarbonate flux to vadose zone relative to cation flux from dissolution of carbonates uncertainty in chemical environment of lower vadose zone with respect to CO2 concentration and pH.	More data on groundwater chemical fluxes better integration of processes like vadose zone respiration and mineralisation into transport models.	0	No	Model-based estimates with empirical checks	3.0 tons	9.5 tons	9.0 tons	0.9	Approximately 100%	Relative ease of measuring and modelling river chemistry and transport processes monitoring infrastructure interplay between saturation state flow and chemical solute concentration in major river system draining Midwest..	Continuation of water chemistry monitoring through sites such as USGS stations (and expansion of capacity of such sites elsewhere in the world).	0.05	No	Model-based estimates with empirical checks
y	Terrestrial biogeochemistry/geochemistry (incl. soil science) Hydrology	Academic	51-75%	<10%	11-50%	<10%	<10%	<10%	Basalt	11-50%	4	2	4	0 Gt CO2e (no impact)	0.5 Gt CO2e (removal)	0.1 Gt CO2e (removal)	0.65	data on natural volcanic systems. basic physical chemistry	hydrochemical export time series	0.5 tons	3.0 tons	0.0 tons (none)	0.65	Approximately 100%	currently popular methods for measuring soil depletion of cations are not robust. 2. Statistics as currently practiced are wholly inadequate.	data to enable mass transfer coefficient calculations.	0.35	Yes	Tightly data constrained model	0.0 tons (none)	2.0 tons	1.0 tons	0.5	Approximately 200%	very limited data from theses systems	significantly more intense lysimeter and groundwater sampling	0.3	Yes	Tightly data constrained model	2.0 tons	6.0 tons	2.5 tons	0.5	Approximately 100%	this is a poorly phrased question. I can't conceive of an example where 10 t/ha ends up in stream water	time series of stream hydrology and chemistry	0.6	Yes	Tightly data constrained model
y	Terrestrial biogeochemistry/geochemistry (incl. soil science) Hydrology	Academic	51-75%	<10%	11-50%	<10%	<10%	<10%	Concrete waste	0-10%	4	2	4	0 Gt CO2e (no impact)	2.0 Gt CO2e (removal)	0.25 Gt CO2e (removal)	0.6	difficulty of application	field trials	4.0 tons	6.0 tons	1.0 tons	0.5	Approximately 200%	lack of empirical observations	more data	0.65	Yes	Tightly data constrained model	4.0 tons	1.0 tons	2.0 tons	0.6	Approximately 200%	lack of data	a carefully monitored field trial with lysimeters and wells	0.6	Yes	Tightly data constrained model	6.0 tons	2.0 tons	3.0 tons	0.65	Approximately 200%	limited data	time series hydrochemical measurements in a field trial	0.5	Yes	Tightly data constrained model
y	Terrestrial biogeochemistry/geochemistry (incl. soil science) Marine biogeochemistry/geochemistry Hydrology		51-75%	<10%	11-50%	<10%	<10%	<10%	Olivine-rich (>50%) rock	0-10%	2	4	2	0.1 Gt CO2e (removal)	1 Gt CO2e (removal)	0.25 Gt CO2e (removal)	0.6	difficulty of implementation		0.5 tons	3.0 tons	1.0 tons	0.7	Approximately 200%	limited data	hydrochemical time sereies	0.7		Tightly data constrained model	1.0 tons	8.0 tons	2.0 tons	0.55	Approximately 200%	limited data	lysimeter and well data from field trial	0.7	Yes	Tightly data constrained model	2.0 tons	7.0 tons	4.0 tons	0.6	Approximately 200%	lack of data	time series data	0.6	Yes	Tightly data constrained model
y	Terrestrial biogeochemistry/geochemistry (incl. soil science)	Academic	11-50%	<10%	<10%	<10%	<10%	<10%	Basalt	11-50%	5	4	4	-0.25 Gt CO2e (net emission)	3 Gt CO2e (removal)	1.5 Gt CO2e (removal)	0.8	estimated feedstock availability other effects (SOC N2O) production/transport emissions	better estimation of globally available feedstock likelihood of implementation at a widescale (based on economics farmers' willingness policy) impacts on organic carbon cycling	3.5 tons	10.0 tons (all)	9.0 tons	0.85	Approximately 50%		non-carbonic acid weathering	0.1	No	Fully empirical measurements	9.0 tons	10.0 tons (all)	9.5 tons	0.7	Approximately 30%	potential for carbonate precipitation	information on deep soils properties and modeling of deep soil processes	0	No	Tightly data constrained model	9.0 tons	10.0 tons (all)	9.5 tons	0.85	Approximately 30%	potential for carbonate precipitation (degassing due to re-equilibration with atmospheric pCO2 not likely to have large impact on efficiency)	more localized data on initial river chemistry conditions to improve modeling	0.15	Don't know	Fully model-based
y	Terrestrial biogeochemistry/geochemistry (incl. soil science)	Academic	11-50%	<10%	<10%	<10%	<10%	<10%	Wollastonite	0-10%	1	4	4	0 Gt CO2e (no impact)	0 Gt CO2e (no impact)	0 Gt CO2e (no impact)	0.5	resource availability- my estimates would not actually be zero but were orders of magnitude lower than the smallest option so rounded to zero	better estimation of globally available feedstock impacts on organic carbon cycling better understanding of potential for secondary mineral precipitation	5.5 tons	10.0 tons (all)	9.0 tons	0.85	Approximately 50%	non-carbonic acid weathering	better ways to measure in situ pH and pCO2 and correct estimated bicarbonate production based on weathering rates for carbonate speciation or to be able to directly measure alkalinity export	0.1	No	Fully empirical measurements	8.0 tons	10.0 tons (all)	8.5 tons	0.7	Approximately 30%	potential for carbonate precipitation	information on deep soils properties and modeling of deep soil processes	0	No	Tightly data constrained model	9.0 tons	10.0 tons (all)	9.5 tons	0.85	Approximately 30%	potential for carbonate precipitation (degassing due to re-equilibration with atmospheric pCO2 not likely to have large impact on efficiency)	more localized data on initial river chemistry conditions to improve modeling	0.15	Don't know	Fully model-based
y	Terrestrial biogeochemistry/geochemistry (incl. soil science)	Academic	11-50%	<10%	<10%	<10%	<10%	<10%	Olivine-rich (>50%) rock	0-10%	2	5	5	0 Gt CO2e (no impact)	0.01 Gt CO2e (removal)	0.01 Gt CO2e (removal)	0.8	estimated feedstock availability other effects (SOC N2O) production/transport emissions	better estimation of globally available feedstock impacts on organic carbon cycling	5.5 tons	10.0 tons (all)	9.0 tons	0.85	Approximately 50%	non-carbonic acid weathering	better ways to measure in situ pH and pCO2 and correct estimated bicarbonate production based on weathering rates for carbonate speciation or to be able to directly measure alkalinity export	0.15	Don't know	Fully empirical measurements	8.5 tons	10.0 tons (all)	9.0 tons	0.7	Approximately 30%	potential for carbonate precipitation	information on deep soils properties and modeling of deep soil processes	0	No	Tightly data constrained model	9.0 tons	10.0 tons (all)	9.5 tons	0.85	Approximately 30%	potential for carbonate precipitation (degassing due to re-equilibration with atmospheric pCO2 not likely to have large impact on efficiency)	more localized data on initial river chemistry conditions to improve modeling	0.15	Don't know	Fully model-based
y	Terrestrial biogeochemistry/geochemistry (incl. soil science)	Academic	11-50%	<10%	<10%	<10%	<10%	<10%	Steel slag	0-10%	3	4	5	-0.01 Gt CO2e (net emission)	0.25 Gt CO2e (removal)	0.1 Gt CO2e (removal)	0.8	estimated feedstock availability other effects (SOC N2O) secondary mineral precipitation	better estimation of globally available feedstock impacts on organic carbon cycling better understanding of potential for secondary mineral precipitation	5.5 tons	10.0 tons (all)	9.0 tons	0.85	Approximately 50%	non-carbonic acid weathering	better ways to measure in situ pH and pCO2 and correct estimated bicarbonate production based on weathering rates for carbonate speciation or to be able to directly measure alkalinity export	0.15	Don't know	Fully empirical measurements	8.5 tons	10.0 tons (all)	9.0 tons	0.7	Approximately 30%	potential for carbonate precipitation	information on deep soils properties and modeling of deep soil processes	0	No	Tightly data constrained model	9.0 tons	10.0 tons (all)	9.5 tons	0.85	Approximately 30%	potential for carbonate precipitation (degassing due to re-equilibration with atmospheric pCO2 not likely to have large impact on efficiency)	more localized data on initial river chemistry conditions to improve modeling	0.15	Don't know	Fully model-based
y	Terrestrial biogeochemistry/geochemistry (incl. soil science)	Academic	51-75%	11-50%	11-50%	<10%	11-50%	<10%	Basalt	76-100%	4	3	2	0.1 Gt CO2e (removal)	1 Gt CO2e (removal)	0.25 Gt CO2e (removal)	0.7	land area weathering rates fates of carbon in soil	AI driven models with experiments lasting 5 years plus across croplands	8.5 tons	10.0 tons (all)	9.0 tons	0.85	Approximately 50%			0.05	No	Tightly data constrained model	8.5 tons	9.5 tons	9.0 tons	0.65	Approximately 50%			0.1	No	Model-based estimates with empirical checks	5.0 tons	9.0 tons	7.0 tons	0.65	Approximately 70%			0	No	Model-based estimates with empirical checks
y	Terrestrial biogeochemistry/geochemistry (incl. soil science) Hydrology	Academic	11-50%		11-50%				Basalt		1	3	2	-0.01 Gt CO2e (net emission)	0.25 Gt CO2e (removal)	0.1 Gt CO2e (removal)	0.8	Current river basin alkalinity fluxes soil pH distributions mining + transport emissions	emissions in crushing and transport at local scales carefully measured field weathering rates (dissolution + precipitation) alkalinity fluxes	3.0 tons	7.0 tons	5.0 tons	0.75	Approximately 100%	reports of field rates (quasi-reliable ones including natural analogues) secondary mineral precipitation uncertainty in how to account for soil pH buffering	Careful trials of alkalinity flux vs feedstock dissolution clarification on counting sources of soil uncertainty (pH buffering) modeling studies with rigorous sensitivity analysis using benchmarked state-of-the-art RT models	0.25	No	Tightly data constrained model	3.0 tons	9.0 tons	6.0 tons	0.7	Approximately 50%	No guarantee that groundwater will reach streams secondary mineral precipitation in groundwater systems (reactivity of aquifer materials) uncertainty in how we count pH buffering (neutralization of surface acidity) relatively closed system assuming no groundwater pumping	measured groundwater compositions along a putative flow path	0.25	Don't know	Tightly data constrained model	2.0 tons	9.0 tons	6.0 tons	0.6	Approximately 100%	Theoretical calculations of CO2 degassing for different alkalinity levels and PCO2 values in gw and stream recent studies of stream degassing uncertainty in how much ERW can shift local gw alkalinity	field experiment design with rigorous monitoring at stream-gw interface (contingously) scale-appropriate simulations of stream network degassing given alkalinity +DIC	0.5	Don't know	Tightly data constrained model
y	Terrestrial biogeochemistry/geochemistry (incl. soil science) Hydrology	Academic	11-50%		11-50%				Wollastonite	0-10%	1	4	3	-0.1 Gt CO2e (net emission)	0 Gt CO2e (no impact)	0 Gt CO2e (no impact)	0.95	Global wollastonite reserve is ~<100Mt so even under perfect conditions max is ~0.07 Gt	Perhaps better info on global supply.	4.0 tons	8.0 tons	6.0 tons	0.8	Approximately 100%	More rapid kinetics less Al to form clays potential for carbonate precipitation	better field measured rates clarification on carbonate in soils (we just asked about transfer)	0.1	No	Tightly data constrained model	5.0 tons	9.0 tons	7.0 tons	0.75	Approximately 100%	typical mean travel times of groundwater less Al released carbonate precipitation more likely	groundwater residence times and flow paths in the region carbonate precipitation potential	0.1	No	Tightly data constrained model	2.0 tons	9.0 tons	6.0 tons	0.75	Approximately 100%	degassing rates in streams calculation of theoretical degassing for given alkalinity/DIC and external PCO2	Better understanding of local degassing rates alkalnity mixing ground water residence times	0.2	Yes	Tightly data constrained model
y	Terrestrial biogeochemistry/geochemistry (incl. soil science) Hydrology	Academic	11-50%		11-50%				Olivine-rich (>50%) rock	11-50%	1	3	3	-0.5 Gt CO2e (net emission)	0.1 Gt CO2e (removal)	0.01 Gt CO2e (removal)	0.9	olivine availability estimates of transportation emissions limitations as an ag product due to high Mg	better numbers on mining/transport (supply chain) emissions	4.0 tons	8.0 tons	6.0 tons	0.8	Approximately 100%	same as wollastonite	field measured rates of dissolution alkalinity response/soil pH buggering	0.15	No	Tightly data constrained model	5.0 tons	9.0 tons	7.0 tons	0.8	Approximately 100%	gw travel times less Al for secondary minerals likely less carbonate precipitation due to Mg instead of Ca	water flow paths and travel times mixing alkalinity transport	0.2	Yes	Tightly data constrained model	2.0 tons	9.0 tons	6.0 tons	0.8	Approximately 100%	degassing rates theoretical equilibrium calculations	better calculations of PCO2 in overall system to constrain degassing degassing at streams	0.2	Yes	Tightly data constrained model
y	Terrestrial biogeochemistry/geochemistry (incl. soil science) Hydrology	Academic	11-50%		11-50%				Steel slag	0-10%	1	3	2	-0.01 Gt CO2e (net emission)	0.01 Gt CO2e (removal)	0 Gt CO2e (no impact)	0.9	Available slag is ~100 million tons/year	potential to use stockpiles other slag markets griding emissions	3.0 tons	8.0 tons	6.0 tons	0.8	Approximately 100%	reactivity and behavior in soil is less certain.	field trials addressing carbonate precipitation and potential for high pH	0.15	Yes	Tightly data constrained model	5.0 tons	9.0 tons	7.0 tons	0.8	Approximately 100%	uncertainty in geochemistry of slag given higher reaction rates of phases like larnite (bigger pulse to gw system)	comparison of mass balance on slag between gross dissolution secondary minerals and soil response for pH and alkalinity	0.15	Yes	Tightly data constrained model	2.0 tons	9.0 tons	6.0 tons	0.8	Approximately 100%	stream degassing considerations same as other feedstocks	same as other feedstocks	0.15	Yes	Tightly data constrained model
y	Terrestrial biogeochemistry/geochemistry (incl. soil science) Hydrology		11-50%		11-50%				Agricultural Lime	0-10%	2	2	4	-0.01 Gt CO2e (net emission)	0.5 Gt CO2e (removal)	0.1 Gt CO2e (removal)	0.7	current deployment of ag lime restriction to acidic soils current estimates are source for CO2		2.0 tons	7.0 tons	4.5 tons	0.8	Approximately 100%	faster dissolution rate of carbonate range of materials	dissolution -precipitation potential pH dynamics of soils	0.05	No	Tightly data constrained model	5.0 tons	9.0 tons	7.0 tons	0.8	Approximately 100%	water travel times <secondary minerals/>carbonate minerals	carbonate precip in aquifers water flow paths/times	0.1	No	Tightly data constrained model	2.0 tons	9.0 tons	6.0 tons	0.8	Approximately 100%	degassing calculations	degassing calculations	0.1	Yes	Tightly data constrained model
y	Terrestrial biogeochemistry/geochemistry (incl. soil science) Hydrology	Academic	11-50%		11-50%				Concrete waste	0-10%				-0.01 Gt CO2e (net emission)	0.1 Gt CO2e (removal)	0.01 Gt CO2e (removal)	0.8	Estimates of annual cement waste and reserves	cement waste inventory/supply crushing grinding needs reaction in soils	2.0 tons	7.0 tons	5.0 tons	0.8	Approximately 100%	high but variable reactivity of cement minerals carbonate precipitation	reactivity of materials in soils / pH impacts	0.1	No	Tightly data constrained model	5.0 tons	9.0 tons	7.0 tons	0.8	Approximately 100%	transport times secondary minerals	transport times secondary minerals/carbonates	0.15	Yes	Tightly data constrained model	2.0 tons	9.0 tons	6.0 tons	0.8	Approximately 100%	as for previous scenarios		0.15	Yes	Tightly data constrained model
y	Terrestrial biogeochemistry/geochemistry (incl. soil science) Freshwater biogeochemistry/geochemistry Marine biogeochemistry/geochemistry	Academic	<10%	<10%	<10%	<10%	<10%	<10%	Basalt	0-10%	5	1	1	-0.01 Gt CO2e (net emission)	0.01 Gt CO2e (removal)	0 Gt CO2e (no impact)	0.85	fundamental flaws in the approach and misunderstanding of the natural carbon cycle	an improved understanding of cation/alkalinity transport in terrestrial systems	0.0 tons (none)	1.0 tons	0.5 tons	0.7	Approximately 50%	difficulties in measuring alkalinity loss and CO2 uptake current MRV not sufficient	we need to understand how alkalinity moves in soil systems the role of cation exchange (it depends on what's being exchanged) and clay formation. The whole premise of ERW is based on what some of us think is a flawed understanding of the natural carbon cycle.	0.15	Don't know	Tightly data constrained model	0.0 tons (none)	1.0 tons	0.5 tons	0.85	Approximately 30%	fundamental flaws in the approach and misunderstanding of the natural carbon cycle	better MRV that tracked all of the elements involved in feedstock (not just cations). we do not understand how alkalinity moves in the subsurface how its removal depends on residence time and what components are important to keep track of (i.e. Si Al cations ???)	0.15	Don't know	Tightly data constrained model	3.0 tons	7.0 tons	5.0 tons	0.7	Approximately 50%	we have a better understanding of potential losses in this 'box'. carbonate precipitation and gas exchange can be modeled with reasonable accuracy and water transit times in these systems is short.	I think we are well on our way to improving our estimates of this box.	0.15	Don't know	Model-based estimates with empirical checks
y	Terrestrial biogeochemistry/geochemistry (incl. soil science)	Academic							Wollastonite	11-50%	1	4	2	0.01 Gt CO2e (removal)	0.25 Gt CO2e (removal)	0.1 Gt CO2e (removal)	0.8	availability of material land that's suitable reaction kinetics	strong acid weathering vs. carbonic acid material access best use areas vs. life cycle emission	4.0 tons	9.0 tons	7.0 tons	0.75	Approximately 30%	strong acid weathering assumption (assume 10% of weathering) clay formation/precipitation of carbonates in soil adequate soil moisture	strong acid weathering site pH climate and soil physical property data	0.1	No	Tightly data constrained model	4.0 tons	9.0 tons	5.5 tons	0.9	Approximately 50%			0	No	Model-based estimates with empirical checks	3.0 tons	8.0 tons	4.5 tons	0.9	Approximately 100%			0.05	No	Model-based estimates with empirical checks
y	Terrestrial biogeochemistry/geochemistry (incl. soil science)	Academic							Olivine-rich (>50%) rock	11-50%	2	5	2	0.1 Gt CO2e (removal)	1 Gt CO2e (removal)	0.1 Gt CO2e (removal)	0.85			8.0 tons	9.0 tons	8.5 tons	0.85	Approximately 50%			0.2	Yes	Tightly data constrained model	6.5 tons	9.0 tons	7.5 tons	0.85	Approximately 50%			0.2	Yes	Tightly data constrained model	4.5 tons	9.0 tons	6.5 tons	0.75	Approximately 50%			0.05	No	Model-based estimates with empirical checks
y	Terrestrial biogeochemistry/geochemistry (incl. soil science)	Academic							Steel slag	0-10%	2	4	2	0.01 Gt CO2e (net removal)	0.25 Gt CO2e (removal)	0.1 Gt CO2e (removal)	0.5			9.0 tons	10.0 tons (all)	9.5 tons	0.75	Approximately 50%	degree of precipitation of carbonates assumed all is CaO	field trials with slag	0.1	Don't know	Tightly data constrained model	8.0 tons	9.5 tons	9.0 tons	0.7	Approximately 50%			0.1	Don't know	Tightly data constrained model	4.5 tons	9.0 tons	6.5 tons	0.7	Approximately 50%			0.05	No	Model-based estimates with empirical checks
y	Terrestrial biogeochemistry/geochemistry (incl. soil science)	Academic							Agricultural Lime	11-50%	4	2	1	-0.25 Gt CO2e (net emission)	0.25 Gt CO2e (removal)	-0.01 Gt CO2e (net emission)	0.8			0.0 tons (none)	6.5 tons	0.5 tons	0.7	Approximately 50%			0.05	No	Model-based estimates with empirical checks	1.5 tons	6.0 tons	2.0 tons	0.5	Approximately 50%			0.05	No	Model-based estimates with empirical checks	5.0 tons	7.5 tons	5.5 tons	0.5	Approximately 50%			0.05	No	Model-based estimates with empirical checks
y	Terrestrial biogeochemistry/geochemistry (incl. soil science)	Academic							Concrete waste	0-10%	1	4	1	-0.1 Gt CO2e (net emission)	0.25 Gt CO2e (removal)	0.01 Gt CO2e (removal)	0.6			2.5 tons	6.0 tons	1.0 tons	0.75	Approximately 50%			0.15	Yes	Model-based estimates with empirical checks	1.0 tons	5.0 tons	1.0 tons	0.5	Approximately 50%			0.2	Yes	Model-based estimates with empirical checks	1.0 tons	5.0 tons	1.5 tons	0.5	Approximately 50%			0.1	No	Model-based estimates with empirical checks
y	Terrestrial biogeochemistry/geochemistry (incl. soil science)	Academic	51-75%	<10%	11-50%	<10%	11-50%	<10%	Basalt	51-75%	4	3	1	< -2 Gt CO2e (net emission)	4 Gt CO2e (removal)	2.0 Gt CO2e (removal)	0.8	N2O reductions replaces lime soil removal and storage	effects on SOC flow paths beyond soils plant growth impacts on CO2	0.5 tons	9.0 tons	6.0 tons	0.75	Approximately 50%	depth of soils length of time only other fate seems like getting adsorbed onto soils longer than 20 years	longer observations lag time of cations on soils degassing (or other loss pathways) in rooting zone	0.25	Don't know	Fully empirical measurements	1.0 tons	8.0 tons	6.0 tons	0.6	Approximately 70%	Lou thinks only 10% will make it through 9-15% degassing cation lag longer than 20 years	full soil profile measurements longer measurements measurements in ag	0.15	Don't know	Tightly data constrained model	5.0 tons	9.5 tons	7.5 tons	0.65	Approximately 100%	Shuang estimates 5-25% loss seeing a big signal in streams could be higher depending on water conditions	empirical measurements stream comparisons watershed measurements	0.15	Don't know	Tightly data constrained model
y	Terrestrial biogeochemistry/geochemistry (incl. soil science)	Academic	51-75%	<10%	11-50%	<10%	11-50%	<10%	Wollastonite	0-10%	2	3	1	-1 Gt CO2e (net emission)	4 Gt CO2e (removal)	0.75 Gt CO2e (removal)	0.65	wollastonite isn't widely available there aren't that many reserves field rates are low	the ability to produce and transport widely more field trials	0.5 tons	9.0 tons	6.0 tons	0.5	Approximately 50%	imagine it behave similar to basalt good measurements at Hubbard brook have been done and they see a solid signal	trials in more places	0.15	Don't know	Fully empirical measurements	1.0 tons	8.0 tons	6.0 tons	0.5	Approximately 70%	imagines it behaves similarly to basalt hard to trace through vadose zone	vadose zone measurements maybe using isotopic tracers	0.15	Don't know	Tightly data constrained model	5.0 tons	9.5 tons	7.5 tons	0.5	Approximately 100%	I believe they see a strong signal in streams in HB	analyses in agricultural rivers that vary in size and chemistry	0.15	Don't know	Tightly data constrained model
y	Terrestrial biogeochemistry/geochemistry (incl. soil science)	Academic	51-75%	<10%	11-50%	<10%	11-50%	<10%	Olivine-rich (>50%) rock	11-50%	3	3	1	-1 Gt CO2e (net emission)	> 5 Gt CO2e (removal)	2.0 Gt CO2e (removal)	0.7	I think olivine will have a higher rate than basalt but will be harder to adopt widely	confidence in olivine having higher rate and not having heavy metal effects	0.5 tons	9.0 tons	5.0 tons	0.65	Approximately 50%	I think it will weather faster but may be more likely than basalt to get held up on clays in tropical soils	more olivine studies in different environments	0.35	Don't know	Fully empirical measurements	1.0 tons	8.0 tons	6.0 tons	0.6	Approximately 70%	Highly weather able at surface but imagine by the time it makes it down here its similar to basalt	measurements	0.15	Don't know	Tightly data constrained model	5.0 tons	9.5 tons	7.5 tons	0.6	Approximately 100%	see signal from other ERW materials in streams	watershed tests of olivine	0.15	Don't know	Tightly data constrained model
y	Terrestrial biogeochemistry/geochemistry (incl. soil science)	Academic	51-75%	<10%	11-50%	<10%	11-50%	<10%	Steel slag	0-10%	2	2	1	-1 Gt CO2e (net emission)	0.25 Gt CO2e (removal)	0.1 Gt CO2e (removal)	0.6	a combo of meta analysis and Google AI results	A better understanding/more data on steel slag	0.5 tons	8.0 tons	5.0 tons	0.5	Approximately 100%	No idea but imagine it's less weatherable than finely ground olivine lime basalt or wollastonite	field trials	0.4	Don't know	Fully empirical measurements	1.0 tons	9.0 tons	5.0 tons	0.5	Approximately 100%	Unsure about steel slag so functionally left blank	Field data	0.4	Don't know	Tightly data constrained model	5.0 tons	9.5 tons	7.5 tons	0.5	Approximately 100%	Unsure about steel slag so functionally left blank	Modeled results	0.15	Don't know	Tightly data constrained model
y	Terrestrial biogeochemistry/geochemistry (incl. soil science)	Academic	51-75%	<10%	11-50%	<10%	11-50%	<10%	Agricultural Lime	11-50%	3	3	1	< -2 Gt CO2e (net emission)	1 Gt CO2e (removal)	0.25 Gt CO2e (removal)	0.65	could be a carbon source under certain conditions ability to sequester carbon still poorly understood	field trials of high lime model assessment of where it's a source and where it's a sink	0.5 tons	9.0 tons	5.0 tons	0.65	Approximately 50%	see significant signal is rivers so transport must be happening to some degree clearly affecting soil pH so weathering according to west and McBride about half lost as CO2	a better understanding of where it's a carbon source and where it's a carbon sink and how much of a carbon sink can be achieved	0.15	Don't know	Fully empirical measurements	1.0 tons	8.0 tons	6.0 tons	0.6	Approximately 70%	lime increases DIC in vadose zone see signal in rivers	in situ measurements through the vadose zone DIC tradeoffs with CO2 flux	0.15	Don't know	Tightly data constrained model	5.0 tons	9.5 tons	7.5 tons	0.6	Approximately 100%	have not seen a discussion of high losses from rivers	CO2 measurement from ag rivers	0.15	Don't know	Tightly data constrained model
y	Terrestrial biogeochemistry/geochemistry (incl. soil science)	Academic	51-75%	<10%	11-50%	<10%	11-50%	<10%	Concrete waste	0-10%	2	2	1	-1 Gt CO2e (net emission)	0.1 Gt CO2e (removal)	0.01 Gt CO2e (removal)	0.6	meta analysis data concrete and lead to CO2 emissions	safety and weathering rates around concrete waste energy to crush does this really work in ag?	0.5 tons	8.0 tons	3.0 tons	0.5	Approximately 100%	seems harder to breakdown and apply to ag soils	more ag trials	0.4	Don't know	Fully empirical measurements	1.0 tons	9.0 tons	4.0 tons	0.55	Approximately 100%	high CO2 emissions in vadose with concrete application	tradeoffs between elevated DIC and CO2 emissions	0.4	Don't know	Tightly data constrained model	5.0 tons	9.5 tons	7.5 tons	0.5	Approximately 100%	Unsure about concrete waste so functionally left blank	what else is contained in concrete and does it pose risks?	0.15	Don't know	Tightly data constrained model
y	Terrestrial biogeochemistry/geochemistry (incl. soil science) Hydrology	Academic	<10%	11-50%					Basalt	0-10%	5	2	3	0 Gt CO2e (no impact)	3 Gt CO2e (removal)	0.5 Gt CO2e (removal)	0.85	weathering efficiency/removal efficiency from previous studies using basalt loss during transport from field to deep ocean global cropland area and likely adoption of ERW on this land	more field data studying basalt weathering on fields more studies on loss of ERW products during transport from field to ocean farmer willingness to spread basalt	0.0 tons (none)	7.0 tons	3.0 tons	0.85	Approximately 30%	removal efficiency for basalt from previous studies plant uptake of cations	more field trials	0.15	Don't know	Tightly data constrained model	0.0 tons (none)	7.0 tons	5.0 tons	0.85	Approximately 100%	competitive cation exchange calciate ppt very little data exists	more studies of deep vadose zone in context of ERW	0.05	No	Model-based estimates with empirical checks	3.0 tons	9.0 tons	7.0 tons	0.85	Approximately 70%	degassing calcite ppt aquatic photosynthesis	using lime weathering signal moving through rivers to validate river models	0.1	Don't know	Fully model-based
y	Terrestrial biogeochemistry/geochemistry (incl. soil science) Hydrology	Academic	<10%	11-50%					Wollastonite	11-50%	4	2	3	0 Gt CO2e (no impact)	3 Gt CO2e (removal)	0.5 Gt CO2e (removal)	0.8	amount of wollastonite currently mined (small) but deposits are large. will take time to build up mining capacity. wollastonite has high removal efficiency based on previous studies	more fieldtrials more studies on loss of ERW products during transport from field to ocean farmer willingness	0.0 tons (none)	7.0 tons	3.0 tons	0.85	Approximately 30%	removal efficiency from previous studies plant uptake of cations	more field trials	0.15	Don't know	Tightly data constrained model	0.0 tons (none)	7.0 tons	3.0 tons	0.85	Approximately 100%	competitive cation exchange calciate ppt very little data exists	more studies of deep vadose zone in context of ERW	0.05	No	Model-based estimates with empirical checks	3.0 tons	9.0 tons	7.0 tons	0.85	Approximately 70%	degassing calcite ppt aquatic photosynthesis	using lime weathering signal moving through rivers to validate river models	0.1	Don't know	Fully model-based
y	Terrestrial biogeochemistry/geochemistry (incl. soil science) Hydrology	Academic	<10%	11-50%					Olivine-rich (>50%) rock	0-10%	5	2	2	0 Gt CO2e (no impact)	4 Gt CO2e (removal)	1 Gt CO2e (removal)	0.85	large availability of olivine good removal of co2 to tonne of olivine suffers surface passivation	field trials more studies on loss of ERW products during transport from field to ocean farmer willingness	0.0 tons (none)	7.0 tons	3.0 tons	0.85	Approximately 30%	removal efficiency from previous studies plant uptake of cations	more field trials	0.15	Don't know	Tightly data constrained model	0.0 tons (none)	7.0 tons	5.0 tons	0.85	Approximately 100%	competitive cation exchange clay formation very little data exists	more studies of deep vadose zone in context of ERW	0.05	No	Model-based estimates with empirical checks	3.0 tons	9.0 tons	7.0 tons	0.85	Approximately 70%	degassing calcite ppt aquatic photosynthesis	using lime weathering signal moving through rivers to validate river models	0.1	Don't know	Fully model-based
y	Terrestrial biogeochemistry/geochemistry (incl. soil science) Hydrology	Academic	<10%	11-50%					Steel slag	0-10%	3	2	2	0 Gt CO2e (no impact)	4 Gt CO2e (removal)	1 Gt CO2e (removal)	0.8	amount of slag that is not currently being used amount of co2 sequestered per tonne of slag	field trials wit slag	0.0 tons (none)	7.0 tons	3.0 tons	0.85	Approximately 30%	surface passivation plant uptake of cations	more field trials	0.5	Yes	Tightly data constrained model	0.0 tons (none)	7.0 tons	4.0 tons	0.85	Approximately 100%	competitive cation exchange clay formation very little data exists	more studies of deep vadose zone in context of ERW	0.5	Yes	Model-based estimates with empirical checks	3.0 tons	9.0 tons	7.0 tons	0.85	Approximately 70%	degassing calcite ppt aquatic photosynthesis	using lime weathering signal moving through rivers to validate river models	0.25	Don't know	Fully model-based
y	Terrestrial biogeochemistry/geochemistry (incl. soil science) Hydrology	Academic	<10%	11-50%					Agricultural Lime	0-10%	5	2	3	-0.1 Gt CO2e (net emission)	1.5 Gt CO2e (removal)	0.5 Gt CO2e (removal)	0.8	current amount of lime available and used relatively small amount of co2 removed per tonne of lime	better prediction of downstream losses	0.0 tons (none)	7.0 tons	3.0 tons	0.85	Approximately 30%	removal efficiency from previous studies plant uptake of cations	measuring movement of lime in current fields where it is used	0.05	No	Tightly data constrained model	0.0 tons (none)	7.0 tons	5.0 tons	0.85	Approximately 100%	competitive cation exchange calciate ppt very little data exists	more studies of deep vadose zone in context of ERW	0.05	No	Model-based estimates with empirical checks	3.0 tons	9.0 tons	7.0 tons	0.85	Approximately 70%	degassing calcite ppt aquatic photosynthesis	using lime weathering signal moving through rivers to validate river models	0.05	No	Fully model-based
y	Terrestrial biogeochemistry/geochemistry (incl. soil science) Hydrology	Academic	<10%	11-50%					Concrete waste	0-10%	2	2	3	-0.1 Gt CO2e (net emission)	0.1 Gt CO2e (removal)	0 Gt CO2e (no impact)	0.7	the amount of existing concrete waste that is not otherwise used the low co2 uptake by concrete per tonne relative to emissions associated with grinding and transporting possibility waste would have weathered regardless	close study of concrete waste life cycle and how much weathering happens already to waste	0.0 tons (none)	7.0 tons	3.0 tons	0.85	Approximately 30%	removal efficiency from previous studies plant uptake of cations	field trial with concrete waste	0.15	Don't know	Tightly data constrained model	0.0 tons (none)	7.0 tons	5.0 tons	0.85	Approximately 100%	competitive cation exchange calciate ppt very little data exists	more studies of deep vadose zone in context of ERW	0.05	No	Model-based estimates with empirical checks	3.0 tons	9.0 tons	7.0 tons	0.85	Approximately 70%	degassing calcite ppt aquatic photosynthesis	using lime weathering signal moving through rivers to validate river models	0.1	Don't know	Fully model-based
y	Terrestrial biogeochemistry/geochemistry (incl. soil science) Freshwater biogeochemistry/geochemistry	Academic	75% +	<10%	11-50%	<10%	51-75%	<10%	Basalt	76-100%	5	4	1	0.01 Gt CO2e (net removal)	0.75 Gt CO2e (removal)	0.25 Gt CO2e (removal)	0.75	Availability of basalt and crop land dissolution dynamics.	Loss of C due to CEC sorption and incorporation into secondary phases. Impact on soil SOM.	1.5 tons	8.0 tons	5.0 tons	0.85	Approximately 50%	weathering rate CEC lag formation of secondary phases	CEC lag formation of secondary phases SOM losses	0.15	No	Fully empirical measurements	5.0 tons	9.5 tons	8.5 tons	0.65	Approximately 50%	formation of secondary phases	flow path lengths ground water residence time formation of secondary phases	0.05	No	Model-based estimates with empirical checks	7.5 tons	9.5 tons	9.0 tons	0.75	Approximately 50%	degassing carbonate precipitation biology	supersaturation for carbonate precipitation role of biology	0.2	No	Tightly data constrained model
y	Terrestrial biogeochemistry/geochemistry (incl. soil science) Freshwater biogeochemistry/geochemistry	Academic	51-75%	<10%	11-50%	<10%	11-50%	<10%	Wollastonite	0-10%	1	4	3	0 Gt CO2e (no impact)	0.1 Gt CO2e (removal)	0.01 Gt CO2e (removal)	0.85	Availability of feedstock dissolution dynamics.	Knowledge about the potential to find more wollastonite outcrops.	2.0 tons	8.5 tons	5.5 tons	0.75	Approximately 50%	weathering rate CEC lag formation of secondary phases	CEC lag formation of secondary phases SOM losses	0.05	No	Fully empirical measurements	4.5 tons	9.0 tons	8.0 tons	0.65	Approximately 50%	formation of secondary phases	flow path lengths ground water residence time formation of secondary phases	0.05	No	Model-based estimates with empirical checks	6.5 tons	9.5 tons	8.5 tons	0.7	Approximately 50%	degassing carbonate precipitation biology	supersaturation for carbonate precipitation role of biology	0.05	No	Tightly data constrained model
y	Terrestrial biogeochemistry/geochemistry (incl. soil science) Freshwater biogeochemistry/geochemistry	Academic	51-75%	<10%	11-50%	<10%	11-50%	<10%	Olivine-rich (>50%) rock	11-50%	4	5	3	0.01 Gt CO2e (net removal)	0.5 Gt CO2e (removal)	0.25 Gt CO2e (removal)	0.65	Availability of feedstock and crop land dissolution dynamics.	Loss of C due to CEC sorption and incorporation into secondary phases. Impact on soil SOM.	2.5 tons	8.5 tons	6.0 tons	0.8	Approximately 50%	weathering rate CEC lag formation of secondary phases	CEC lag formation of secondary phases SOM losses	0.75	Yes	Fully empirical measurements	5.0 tons	9.0 tons	8.0 tons	0.65	Approximately 50%	formation of secondary phases	flow path lengths ground water residence time formation of secondary phases	0.25	Yes	Model-based estimates with empirical checks	7.0 tons	9.5 tons	8.5 tons	0.7	Approximately 50%	degassing carbonate precipitation biology	supersaturation for carbonate precipitation role of biology	0.5	Yes	Tightly data constrained model
y	Terrestrial biogeochemistry/geochemistry (incl. soil science) Freshwater biogeochemistry/geochemistry	Academic	51-75%	<10%	11-50%	<10%	11-50%	<10%	Steel slag	0-10%	3	5	3	0.01 Gt CO2e (net removal)	0.25 Gt CO2e (removal)	0.1 Gt CO2e (removal)	0.65	Availability of feedstock dissolution dynamics.	Loss of C due to CEC sorption and incorporation into secondary phases. Impact on soil SOM.	3.0 tons	8.5 tons	6.5 tons	0.75	Approximately 50%	weathering rate CEC lag formation of secondary phases	CEC lag formation of secondary phases SOM losses	0.8	Yes	Fully empirical measurements	4.5 tons	9.0 tons	7.5 tons	0.7	Approximately 50%	formation of secondary phases	flow path lengths ground water residence time formation of secondary phases	0.25	Yes	Model-based estimates with empirical checks	6.5 tons	9.5 tons	8.5 tons	0.7	Approximately 50%	degassing carbonate precipitation biology	supersaturation for carbonate precipitation role of biology	0.5	Yes	Tightly data constrained model
y	Terrestrial biogeochemistry/geochemistry (incl. soil science) Freshwater biogeochemistry/geochemistry	Academic	51-75%	<10%	11-50%	<10%	11-50%	<10%	Agricultural Lime	11-50%	4	3	4	0.1 Gt CO2e (removal)	1 Gt CO2e (removal)	0.5 Gt CO2e (removal)	0.8	Availability of feedstock and crop land dissolution dynamics.	Loss of C due to CEC sorption and incorporation into secondary phases. Impact on soil SOM.	3.5 tons	8.5 tons	7.0 tons	0.9	Approximately 50%	weathering rate CEC lag formation of secondary phases	CEC lag formation of secondary phases SOM losses	0.05	No	Fully empirical measurements	4.0 tons	9.0 tons	7.5 tons	0.7	Approximately 50%	formation of secondary phases	flow path lengths ground water residence time formation of secondary phases	0.05	No	Model-based estimates with empirical checks	6.0 tons	9.5 tons	8.0 tons	0.7	Approximately 50%	degassing carbonate precipitation biology	supersaturation for carbonate precipitation role of biology	0.25	No	Tightly data constrained model
y	Terrestrial biogeochemistry/geochemistry (incl. soil science) Freshwater biogeochemistry/geochemistry	Academic	51-75%	<10%	11-50%	<10%	11-50%	<10%	Concrete waste	0-10%	3	4	3	0.01 Gt CO2e (net removal)	0.25 Gt CO2e (removal)	0.1 Gt CO2e (removal)	0.65	Availability of feedstock and crop land dissolution dynamics.	Loss of C due to CEC sorption and incorporation into secondary phases. Impact on soil SOM.	2.5 tons	8.5 tons	6.0 tons	0.75	Approximately 50%	weathering rate CEC lag formation of secondary phases	CEC lag formation of secondary phases SOM losses	0.15	No	Fully empirical measurements	4.5 tons	9.0 tons	7.5 tons	0.7	Approximately 50%	formation of secondary phases	flow path lengths ground water residence time formation of secondary phases	0.1	No	Model-based estimates with empirical checks	7.0 tons	9.5 tons	8.0 tons	0.7	Approximately 50%	degassing carbonate precipitation biology	supersaturation for carbonate precipitation role of biology	0.2	No	Tightly data constrained model
y	Terrestrial biogeochemistry/geochemistry (incl. soil science)	Academic	51-75%	<10%	<10%	<10%	<10%	<10%	Basalt	51-75%	2	1	1	< -2 Gt CO2e (net emission)	0.5 Gt CO2e (removal)	0.1 Gt CO2e (removal)	0.5	lifecycle emissions actually inorganic C formation and lifetime of inorganic C	more field studies more thorough lifecycle assessments data from a wider range of field sites	0.0 tons (none)	5.0 tons	1.0 tons	0.5	> 1000%	Lack of data	More and improved measurements over a wider range of ecosystems and conditions	0.5	Don't know	Fully empirical measurements	0.0 tons (none)	5.0 tons	1.0 tons	0.5	> 1000%	lack of data	more and better data	0.5	Don't know	Fully empirical measurements	0.0 tons (none)	5.0 tons	1.0 tons	0.5	> 1000%	lack of data	more and better data	0.5	Don't know	Fully empirical measurements
y	Terrestrial biogeochemistry/geochemistry (incl. soil science) Freshwater biogeochemistry/geochemistry Marine biogeochemistry/geochemistry	Academic	<10%	<10%	<10%	<10%	<10%	<10%	Olivine-rich (>50%) rock	0-10%	4	1	1	-0.01 Gt CO2e (net emission)	0.01 Gt CO2e (removal)	0 Gt CO2e (no impact)	0.8	my understanding of the modern carbon cycle and a basic understanding of the LCA associated with these processes	fate of all of the constituents (cations and otherwise) in amended material.	0.5 tons	2.0 tons	1.0 tons	0.8	Approximately 30%			0.15	No	Tightly data constrained model	0.0 tons (none)	1.0 tons	0.5 tons	0.85	Approximately 30%			0.15	No	Tightly data constrained model	5.0 tons	8.0 tons	6.0 tons	0.75	Approximately 50%			0.15	No	Model-based estimates with empirical checks
[truncated: 25 more columns]
